# Supplementary material for: Prefrontal Cortical Regulation of REM Sleep
Source: Research Square preprint supplement (doi:10.21203/rs.3.rs-1417511/v1), 2023-10-10
Supplement: Supplementary file 1 [file b472a24645d4211a91d975f7.xlsx]

## Sheet: Sheet1
Figure	Group analysis	Statistic	P-value	Effect size	Comparisons	Pairwise tests	Statistic	P-value	Effect size	Tail	Sample size	Subjects
1d	Two way RM-ANOVA with states (REM, Wake, or NREM) and laser (baseline or laser) as within factors	F(2, 20) = 79.0445	P = 0.0000	Generalized eta-squared [ηg2] = 0.6573	REM, baseline vs laser	Pairwise t-tests with Holm-Bonferroni correction	T(10) = 8.7898	P = 0.0000	Hedges' g = 3.9437	Two-tailed	n = 11	Mice
					Wake, baseline vs laser		T(10) = 3.2137	P = 0.0093	Hedges' g = 0.7203	Two-tailed
					NREM, baseline vs laser		T(10) = -11.3685	P = 0.0000	Hedges' g = -3.0472	Two-tailed
1e	Mixed ANOVA with state (REM, Wake or NREM) as within factor and virus (eYFP or ChR2) as between factor	F(2, 34) = 45.7940	P = 0.0000	Partial eta-squared [ηp2] = 0.7293	REM, eYFP vs ChR2	Pairwise t-tests with Holm-Bonferroni correction	T(14.4157) = 7.7918	P = 0.0000	Hedges' g = 3.0840	Two-tailed	eYFP n = 8 ChR2 n = 11	Mice
					Wake, eYFP vs ChR2		T(13.7164) = 2.3852	P = 0.0321	Hedges' g = -3.7329	Two-tailed
					NREM, eYFP vs ChR2		T(15.5962) = -9.2738	P = 0.0000	Hedges' g = -0.9358	Two-tailed
1f, bottom	Two way RM-ANOVA with frequency band (δ, θ, or γ) and laser (baseline or laser) as within factors	F(2, 20) = 123.6494	P = 0.0000	ηg2 = 0.7669	δ, baselinve vs laser	Pairwise t-tests with Holm-Bonferroni correction	T(10) = -10.5438	P = 0.0000	Hedges' g = -3.3116	Two-tailed	n = 11	Mice
					θ, baseline vs laser		T(10) = 4.9229	P = 0.0006	Hedges' g = 1.8794	Two-tailed
					γ, baseline vs laser		T(10) = 10.8078	P = 0.0000	Hedges' g = 4.4005	Two-tailed
1g	-	-	-	-	NREM to REM	Bootstrap	-	P = 0.0001	md = 0.1534, CI = [0.1345, 0.1719]	Two-tailed	n = 11	Mice
					REM to Wake			P = 0.0001	md = -0.1183, CI = [-0.1512, -0.0861]	Two-tailed
					NREM to Wake			P = 0.9274	md = 0.0007, CI = [-0.0156, 0.0174]	Two-tailed
					Wake to NREM			P = 0.0042	md = -0.0265, CI = [-0.0445, -0.0085]	Two-tailed
2c	Mixed ANOVA with laser (OFF or ON) as within factor and virus (eYFP or ChR2) as between factor	Laser, F(1, 17) = 43.5171 Interaction, F(1, 17) = 34.6992	Laser, P = 0.0000 Interaction, P = 0.0000	Laser, ηp2 = 0.7191 Interaction, ηp2 = 0.6712	eYFP, laser OFF vs ON	Pairwise t-tests with Holm-Bonferroni correction	T(7) = -0.3495	P = 0.7370	Hedges' g = -0.1137	Two-tailed	n = 8	Mice
					ChR2, laser OFF vs ON		T(10) = 7.2993	P = 0.0001	Hedges' g = 2.4453	Two-tailed	n = 11	Mice
					Laser, OFF eYFP vs ChR2		T(15.7653) = -4.4053	P = 0.0009	Hedges' g = -1.9358	Two-tailed	eYFP n = 8 ChR2 n = 11	Mice
					Laser, ON eYFP vs ChR2		T(14.7951) = 3.3386	P = 0.0046	Hedges' g = 1.3281	Two-tailed
2e					Peak frequency
	Two way RM-ANOVA with type (tonic or phasic) and laser (OFF or ON) as within factors	Type, F(1, 10) = 920.4167 Interaction, F(1, 10) = 13.1579	Type, P = 0.0000 Interaction, P = 0.0046	Type, ηg2 = 0.9332 Interaction, ηg2 = 0.1366	Laser OFF, tonic vs phasic	Pairwise t-tests with Holm-Bonferroni correction	T(10) = 19.9411	P = 0.0000	Hedges' g = 7.6377	Two-tailed	n = 11	Mice
					Laser ON, tonic vs phasic		T(10) = 31.3050	P = 0.0000	Hedges' g = 6.0913	Two-tailed
					EEG θ power
	Two way RM-ANOVA with type (tonic or phasic) and laser (OFF or ON) as within factors	Type, F(1, 10) = 134.1941 Interaction, F(1, 10) = 0.0649	Type, P = 0.0000 Interaction, P = 0.8041	Type, ηg2 = 0.4545 Interaction, ηg2 = 0.002	Laser OFF, tonic vs phasic	Pairwise t-tests with Holm-Bonferroni correction	T(10) = 8.2448	P = 0.0000	Hedges' g = 1.6281	Two-tailed	n = 11	Mice
					Laser ON, tonic vs phasic		T(10) = 12.2682	P = 0.0000	Hedges' g = 1.7290	Two-tailed
2f	Two way RM-ANOVA with type (tonic or phasic) and laser (OFF or ON) as within factors	Type, F(1, 7) = 114.9316 Interaction, F(1, 7) = 24.7587	Type, P = 0.0000 Interaction, P = 0.0016	Type, ηg2 = 0.2473 Interaction, ηg2 = 0.0152	Laser OFF, tonic vs phasic	Pairwise t-tests with Holm-Bonferroni correction	T(7) = 10.0550	P = 0.0000	Hedges' g = 1.1257	Two-tailed	n = 8	Mice
					Laser ON, tonic vs phasic		T(7) = 9.6786	P = 0.0000	Hedges' g = 0.8883	Two-tailed
2g	Mixed ANOVA with laser (OFF or ON) as within factor and virus (eYFP or ChR2) as between factor	Laser, F(1, 17) = 23.9413 Interaction F(1, 17) = 17.1522	Laser, P = 0.0001 Interaction, P = 0.0007	Laser, ηp2 = 0.5848 Interaction, ηp2 = 0.5022	eYFP, laser OFF vs ON	Pairwise t-tests with Holm-Bonferroni correction	T(7) = 0.0428	P = 0.9671	Hedges' g = 0.0237	Two-tailed	n = 8	Mice
					ChR2, laser OFF vs ON		T(10) = 5.2618	P = 0.0007	Hedges' g = 2.2253	Two-tailed	n = 11	Mice
					Laser OFF, eYFP vs ChR2		T(16.7075) = -2.5839	P = 0.0195	Hedges' g = -1.0651	Two-tailed	eYFP n = 8 ChR2 n = 11	Mice
					Laser ON, eYFP vs ChR2		T(13.2807) = 4.2145	P = 0.0019	Hedges' g = 1.6449	Two-tailed
2i	Mixed ANOVA with laser (OFF or ON) as within factor and virus (eYFP or iC++) as between factor	Laser, F(1, 14) = 12.5822 Interaction, F(1, 14) = 21.7920	Laser, P = 0.0032 Interaction, P = 0.0004	Laser, ηp2 = 0.4733 Interaction, ηp2 = 0.6089	eYFP, laser OFF vs ON	Pairwise t-tests with Holm-Bonferroni correction	T(7) = 0.6586	P = 0.5312	Hedges' g = 0.2631	Two-tailed	n = 8	Mice
					iC++, laser OFF vs ON		T(7) = -7.8234	P = 0.0002	Hedges' g = 1.2836	Two-tailed	n = 8	Mice
					Laser OFF, eYFP vs iC++		T(14) = 2.1511	P = 0.0988	Hedges' g = 1.0169	Two-tailed	eYFP n = 8 iC++ n = 8	Mice
					Laser ON, eYFP vs iC++		T(14) = -1.5887	P = 0.1345	Hedges' g = -0.7510	Two-tailed
2j	Mixed ANOVA with laser (OFF or ON) as within factor and virus (eYFP or iC++) as between factor	Laser, F(1, 14) = 4.7310 Interaction, F(1, 14) = 25.0681	Laser, P = 0.0473 Interaction, P = 0.0002	Laser, ηp2 = 0.2526 Interaction, ηp2 = 0.6417	eYFP, laser OFF vs ON	Pairwise t-tests with Holm-Bonferroni correction	T(7) = 2.1336	P = 0.0703	Hedges' g = 0.9365	Two-tailed	n = 8	Mice
					iC++, laser OFF vs ON		T(7) = -4.8003	P = 0.0039	Hedges' g = -2.4588	Two-tailed	n = 8	Mice
					Laser OFF, eYFP vs iC++		T(14) = 0.7330	P = 0.4757	Hedges' g = 0.3465	Two-tailed	eYFP n = 8 iC++ n = 8	Mice
					Laser ON, eYFP vs iC++		T(14) = -5.2192	P = 0.0003	Hedges' g = -2.4672	Two-tailed
3d	Two way RM-ANOVA with states (REM, Wake, or NREM) and laser (baseline or laser) as within factors	F(2, 14) = 21.7919	P = 0.0001	ηg2 = 0.2728	REM, baseline vs laser	Pairwise t-tests with Holm-Bonferroni correction	T(7) = -6.9068	P = 0.0007	Hedges' g = -2.4617	Two-tailed	n = 8	Mice
					Wake, baseline vs laser		T(7) = 0.3193	P = 0.7588	Hedges' g = 0.0732	Two-tailed
					NREM, baseline vs laser		T(7) = 5.0792	P = 0.0029	Hedges' g = 1.0229	Two-tailed
3e	Mixed ANOVA with state (REM, Wake or NREM) as within factor and virus (eYFP or ChR2) as between factor	F(2, 26) = 19.7850	P = 0.0000	ηp2 = 0.6035	REM, eYFP vs ChR2	Pairwise t-tests with Holm-Bonferroni correction	T(11.9408) = -6.6517	P = 0.0001	Hedges' g = -3.1418	Two-tailed	eYFP n = 7 ChR2 n = 8	Mice
					Wake, eYFP vs ChR2		T(12.6845) = -0.4858	P = 0.6354	Hedges' g = -0.2316	Two-tailed
					NREM, eYFP vs ChR2		T(12.9992) = 5.0417	P = 0.0005	Hedges' g = 2.4295	Two-tailed
3f	-	-	-	-	NREM to REM	Bootstrap	-	P = 0.0001	md = -0.0551, CI = [-0.0686, -0.0419]	Two-tailed	n = 8	Mice
					REM to Wake			P = 0.0001	md = 0.0976, CI = [0.0516, 0.1417]	Two-tailed
					NREM to Wake			P = 0.0824	md = 0.0178, CI = [-0.0024, 0.0383]	Two-tailed
					Wake to NREM			P = 0.0246	md = 0.0284, CI = [0.0034, 0.0528]	Two-tailed
3h	Mixed ANOVA with laser (OFF or ON) as within factor and virus (eYFP or ChR2) as between factor	Laser, F(1, 13) = 57.8071 Interaction, F(1, 13) = 29.8526	Laser, P = 0.0000 Interaction, P = 0.0001	Laser, ηp2 = 0.8164 Interaction, ηp2 = 0.6966	eYFP, laser OFF vs ON	Pairwise t-tests with Holm-Bonferroni correction	T(6) = -0.8392	P = 0.4062	Hedges' g = -0.3203	Two-tailed	n = 7	Mice
					ChR2, laser OFF vs ON		T(7) = -16.9425	P = 0.0000	Hedges' g = -2.9616	Two-tailed	n = 8	Mice
					Laser OFF, eYFP vs ChR2		T(12.8049) = 0.9312	P = 0.3690	Hedges' g = 0.4451	Two-tailed	eYFP n = 7 ChR2 n = 8	Mice
					Laser ON, eYFP vs ChR2		T(9.2137) = -3.2874	P = 0.0183	Hedges' g = -1.6618	Two-tailed
3i	Mixed ANOVA with laser (OFF or ON) as within factor and virus (eYFP or ChR2) as between factor	Laser, F(1, 13) = 48.6420 Interaction, F(1, 13) = 55.8171	Laser, P = 0.0000 Interaction, P = 0.0000	Laser, ηp2 = 0.7891 Interaction, ηp2 = 0.8111	eYFP, laser OFF vs ON	Pairwise t-tests with Holm-Bonferroni correction	T(6) = 0.5061	P = 0.6309	Hedges' g = 0.2531	Two-tailed	n = 7	Mice
					ChR2, laser OFF vs ON		T(7) = -20.1637	P = 0.0000	Hedges' g = -4.6852	Two-tailed	n = 8	Mice
					Laser OFF, eYFP vs ChR2		T(12.2111) = 0.9037	P = 0.3836	Hedges' g = 0.4437	Two-tailed	eYFP n = 7 ChR2 n = 8	Mice
					Laser ON, eYFP vs ChR2		T(10.4700) = -6.7975	P = 0.0001	Hedges' g = -3.3971	Two-tailed
4b	Two way RM-ANOVA with states (REM, Wake, or NREM) and laser (baseline or laser) as within factors	F(2, 18) = 29.7499	P = 0.0002	ηg2 = 0.6523	REM, baseline vs laser	Pairwise t-tests with Holm-Bonferroni correction	T(9) = 5.9977	P = 0.0006	Hedges' g = 2.8051	Two-tailed	n = 10	Mice
					Wake, baseline vs laser		T(9) = -2.2899	P = 0.0478	Hedges' g = -0.4732	Two-tailed
					NREM, baseline vs laser		T(9) = -5.1037	P = 0.0013	Hedges' g = -2.7444	Two-tailed
4d	-	-	-	-	NREM to REM	Bootstrap	-	P = 0.0001	md = 0.1431, CI = [0.1239, 0.1620]	Two-tailed	n = 10	Mice
					REM to Wake			P = 0.0001	md = -0.0979, CI = [-0.1399, -0.0552]	Two-tailed
					NREM to Wake			P = 0.0001	md = -0.0368, CI = [-0.0532, -0.0204]	Two-tailed
					Wake to NREM			P = 0.8128	md = -0.0020, CI = [-0.0188, 0.0152]	Two-tailed
4f	Mixed ANOVA with laser (OFF or ON) as within factor and virus (eYFP or ChR2) as between factor	Laser, F(1, 17) = 21.9904 Interaction, F(1, 17) = 19.2589	Laser, P = 0.0002 Interaction, P = 0.0004	Laser, ηp2 = 0.5640 Interaction, ηp2 = 0.5312	eYFP, laser OFF vs ON	Pairwise t-tests with Holm-Bonferroni correction	T(8) = 0.0793	P = 0.9388	Hedges' g = 0.0302	Two-tailed	n = 9	Mice
					ChR2, laser OFF vs ON		T(9) = 5.0480	P = 0.0014	Hedges' g = 2.5626	Two-tailed	n = 10	Mice
					Laser OFF, eYFP vs ChR2		T(14.7389) = -1.3109	P = 0.2100	Hedges' g = -0.5598	Two-tailed	eYFP n = 9 ChR2 n = 10	Mice
					Laser ON, eYFP vs ChR2		T(15.1293) = 5.0904	P = 0.0003	Hedges' g = 2.1786	Two-tailed
4g	Mixed ANOVA with laser (OFF or ON) as within factor and virus (eYFP or ChR2) as between factor	Laser, F(1, 17) = 17.2767 Interaction, F(1, 17) = 11.5266	Laser, P = 0.0007 Interaction, P = 0.0034	Laser, ηp2 = 0.5040 Interaction, ηp2 = 0.4041	eYFP, laser OFF vs ON	Pairwise t-tests with Holm-Bonferroni correction	T(8) = 0.6848	P = 0.5128	Hedges' g = 0.3464	Two-tailed	n = 9	Mice
					ChR2, laser OFF vs ON		T(9) = 4.2456	P = 0.0043	Hedges' g = 1.9702	Two-tailed	n = 10	Mice
					Laser OFF, eYFP vs ChR2		T(12.1525) = -3.6413	P = 0.0066	Hedges' g = -1.5357	Two-tailed	eYFP n = 9 ChR2 n = 10	Mice
					Laser ON, eYFP vs ChR2		T(12.7289) = 2.8533	P = 0.0138	Hedges' g = 1.2067	Two-tailed
4i	Two way RM-ANOVA with states (REM, Wake, or NREM) and laser (baseline or laser) as within factors	F(2, 18) = 15.5526	P = 0.0022	ηg2 = 0.3281	REM, baseline vs laser	Pairwise t-tests with Holm-Bonferroni correction	T(9) = -9.6853	P = 0.0000	Hedges' g = -2.5004	Two-tailed	n = 10	Mice
					Wake, baseline vs laser		T(9) = 3.7743	P = 0.0088	Hedges' g = 1.0481	Two-tailed
					NREM, baseline vs laser		T(9) = 1.5042	P = 0.1668	Hedges' g = 0.5627	Two-tailed
4k	-	-	-	-	NREM to REM	Bootstrap	-	P = 0.0001	md = -0.0366, CI = [-0.0497, -0.0232]	Two-tailed	n = 10	Mice
					REM to Wake			P = 0.0622	md = 0.03611, CI = [-0.0015, 0.0727]	Two-tailed
					NREM to Wake			P = 0.0002	md = 0.03078, CI = [0.0160, 0.0455]	Two-tailed
					Wake to NREM			P = 0.3630	md = -0.0087, CI = [-0.0272, 0.0104]	Two-tailed
4m	Mixed ANOVA with laser (OFF or ON) as within factor and virus (eYFP or iC++) as between factor	Laser, F(1, 16) = 19.7080 Interaction, F(1, 16) = 11.9057	Laser, P = 0.0004 Interaction, P = 0.0033	Laser, ηp2 = 0.5519 Interaction, ηp2 = 0.4266	eYFP, laser OFF vs ON	Pairwise t-tests with Holm-Bonferroni correction	T(7) = -0.3704	P = 0.7220	Hedges' g = -0.1577	Two-tailed	n = 8	Mice
					iC++, laser OFF vs ON		T(9) = -5.8311	P = 0.0005	Hedges' g = -1.4154	Two-tailed	n = 10	Mice
					Laser OFF, eYFP vs iC++		T(14.4945) = 0.7776	P = 0.4493	Hedges' g = 0.3300	Two-tailed	eYFP n = 8 iC++ n = 10	Mice
					Laser ON, eYFP vs iC++		T(15.6413) = -2.9007	P = 0.0212	Hedges' g = -1.2972	Two-tailed
4n	Mixed ANOVA with laser (OFF or ON) as within factor and virus (eYFP or iC++) as between factor	Laser, F(1, 16) = 1.3892 Interaction, F(1, 16) = 8.3271	Laser, P = 0.2558 Interaction, P = 0.0108	Laser, ηp2 = 0.0799 Interaction, ηp2 = 0.3423	eYFP, laser OFF vs ON	Pairwise t-tests with Holm-Bonferroni correction	T(7) = 1.1365	P = 0.2931	Hedges' g = 0.4864	Two-tailed	n = 8	Mice
					iC++, laser OFF vs ON		T(9) = -3.4605	P = 0.0143	Hedges' g = -1.3219	Two-tailed	n = 10	Mice
					Laser OFF, eYFP vs iC++		T(11.6279) = -0.6249	P = 0.5441	Hedges' g = -0.2958	Two-tailed	eYFP n = 8 iC++ n = 10	Mice
					Laser ON, eYFP vs iC++		T(11.9777) = -2.9482	P = 0.0244	Hedges' g = -1.3893	Two-tailed
5e
5f, left	Two way RM-ANOVA with REM bout duration (short or long) and state (REM, Wake or NREM) as within factors	REM duration, F(1, 35) = 8.6816 Interaction, F(2, 70) = 7.6124	REM duration, P = 0.0057 Interaction, P = 0.0014	REM duration, ηg2 = 0.0554 Interaction, ηg2 = 0.0552	REM, short vs long	Pairwise t-tests with Holm-Bonferroni correction	T(70) = 4.1823	P = 0.0002	Hedges' g = 0.9752	Two-tailed	n = 36	Cells
					Wake, short vs long		T(70) = 1.9513	P = 0.1101	Hedges' g = 0.4550	Two-tailed
					NREM, short vs long		T(70) = -0.4140	P = 0.6801	Hedges' g = -0.0965	Two-tailed
5f, right	Two way RM-ANOVA with REM bout duration (short or long) and state (REM, Wake or NREM) as within factors	REM duration, F(1, 42) = 0.6401 Intreaction, F(2, 84) = 0.9590	REM duration, P = 0.4282 Intreaction, P = 0.3656	REM duration, ηg2 = 0.0019 Interaction, ηg2 = 0.0037	REM, short vs long	Pairwise t-tests with Holm-Bonferroni correction	-	-	-	Two-tailed	n = 43	Cells
					Wake, short vs long		-	-	-	Two-tailed
					NREM, short vs long		-	-	-	Two-tailed
5g, left	-	-	-	-	Pre vs post	Paired t-test	T(35) = 2.3737	P = 0.0232	Cohen's d = 0.3956	Two-tailed	n = 36	Cells
5g, right	-	-	-	-	Pre vs post	Paired t-test	T(42) = -0.3245	P = 0.7471	Cohen's d = 0.0495	Two-tailed	n = 43	Cells
Ext. Data 1d	One way RM-ANOVA with state (REM, Wake or NREM) as within factor	F(2, 12) = 160.1214	P = 0.0000	ηg2 = 0.9496	REM vs Wake	Pairwise t-tests with Holm-Bonferroni correction	T(6) = -10.7821	P = 0.0001	Hedges' g = -5.1429	Two-tailed	n =7	Mice
					REM vs NREM		T(6) = 15.9342	P = 0.0000	Hedges' g = 7.9798	Two-tailed
					Wake vs NREM		T(6) = 7.5159	P = 0.0003	Hedges' g = 5.1967	Two-tailed
Ext. Data 1e	One way RM-ANOVA with 10 s time bins as within factor	F(8, 48) = 69.1853	P = 0.0000	ηg2 = 0.8813	Baseline vs -50 to -40 sec	Pairwise t-tests with Holm-Bonferroni correction	T(6) = -1.6102	P = 0.3169	Hedges' g = -0.2942	Two-tailed	n = 7	Mice
					Baseline vs -40 to -30 sec		T(6) = 1.0920	P = 0.3169	Hedges' g = 0.2641	Two-tailed
					Baseline vs -30 to -20 sec		T(6) = 3.1102	P = 0.1042	Hedges' g = 0.6850	Two-tailed
					Baseline vs -20 to -10 sec		T(6) = 8.2071	P = 0.0044	Hedges' g = 1.2635	Two-tailed
					Baseline vs -10 to 0 sec		T(6) = 10.7871	P = 0.0012	Hedges' g = 2.3179	Two-tailed
					Baselive vs 0 to 10 sec		T(6) = 10.5302	P = 0.0014	Hedges' g = 4.7528	Two-tailed
					Baseline vs 10 to 20 sec		T(6) = 11.9145	P = 0.0007	Hedges' g = 6.4259	Two-tailed
					Baseline vs 20 to 30 sec		T(6) = 9.9314	P = 0.0018	Hedges' g = 5.5827	Two-tailed
Ext. Data 2c	Two way RM-ANOVA with states (REM, Wake, or NREM) and laser (baseline or laser) as within factors	F(2, 14) = 0.7488	P = 0.4675	ηg2 = 0.0101	REM, baseline vs laser	Pairwise t-tests with Holm-Bonferroni correction	-	-	-	-	n = 8	Mice
					Wake, baseline vs laser
					NREM, baseline vs laser
Ext. Data 2d	-	-	-	-	REM to REM	Bootstrap	-	P = 0.0001	md = 0.1183, CI = [0.0861, 0.1512]	Two-tailed	n = 11	Mice
					Wake to Wake			P = 0.0042	md = 0.0266, CI = [0.0085, 0.0445]	Two-tailed
					NREM to NREM			P = 0.0001	md = -0.1541, CI = [-0.1728, -0.1354]	Two-tailed
Ext. Data 2e	-	-	-	-	NREM to REM	Bootstrap	-	P = 0.0001	md = 0.1567, CI = [0.1311, 0.1829]	Two-tailed	eYFP n = 8 ChR2 n = 11	Mice
					REM to Wake			P = 0.0012	md = -0.0986, CI = [-0.1577, -0.0388]	Two-tailed
					NREM to Wake			P = 0.3610	md = -0.0121, CI = [-0.0382, 0.0139]	Two-tailed
					Wake to NREM			P = 0.3684	md = -0.0126, CI = [-0.0401, 0.0148]	Two-tailed
					REM to REM			P = 0.0012	md = 0.0986, CI = [0.0388, 0.1577]	Two-tailed
					Wake to Wake			P = 0.3684	md = 0.0126, CI = [-0.0148, 0.0401]	Two-tailed
					NREM to NREM			P = 0.0001	md = -0.1447, CI = [-0.1749, -0.1146]	Two-tailed
Ext. Data 2f, top	Two way RM-ANOVA with frequency band (δ, θ or σ) and laser (OFF or ON) as within factors	Laser, F(1, 10) = 35.7886 Interaction, F(2, 20) = 42.6702	Laser, P = 0.0001 Interaction, P = 0.0000	Laser, ηg2 = 0.0195 Interaction, ηg2 = 0.0247	δ, laser OFF vs ON	Pairwise t-tests with Holm-Bonferroni correction	T(10) = -1.9386	P = 0.0813	Hedges' g = -0.3117	Two-tailed	n = 11	Mice
					θ, laser OFF vs ON		T(10) = 7.5763	P = 0.0000	Hedges' g = 0.3499	Two-tailed
					σ, laser OFF vs ON		T(10) = 8.5492	P = 0.0000	Hedges' g = 0.9545	Two-tailed
Ext. Data 2f, bottom	Mixed ANOVA with frequency band (δ, θ or σ) as within factor and virus (eYFP or ChR2) as between factor	F (2, 34) = 32.5031	P = 0.0000	ηg2 = 0.6566	δ, eYFP vs ChR2	Pairwise t-tests with Holm-Bonferroni correction	T(15.6059) = -3.1196	P = 0.0068	Hedges' g = -1.2559	Two-tailed	eYFP n = 8 ChR2 n = 11	Mice
					θ, eYFP vs ChR2		T(16.3471) = 5.7057	P = 0.0001	Hedges' g = 2.4748	Two-tailed
					σ, eYFP vs ChR2		T(15.6516) = 6.0015	P = 0.0001	Hedges' g = 2.4179	Two-tailed
Ext. Data 2g, top	Two way RM-ANOVA with frequency band (δ, θ or σ) and laser (OFF or ON) as within factors	Laser, F(1, 10) = 8.6614 Interaction, F(2, 20) = 21.0871	Laser, P = 0.0147 Interaction, P = 0.0007	Laser, ηg2 = 0.0025 Interaction, ηg2 = 0.0173	δ, laser OFF vs ON	Pairwise t-tests with Holm-Bonferroni correction	T(10) = -4.3085	P = 0.0046	Hedges' g = -0.2771	Two-tailed	n = 11	Mice
					θ, laser OFF vs ON		T(10) = 3.4535	P = 0.0106	Hedges' g = 0.1525	Two-tailed
					σ, laser OFF vs ON		T(10) = 3.5474	P = 0.0106	Hedges' g = 0.2227	Two-tailed
Ext. Data 2g, bottom	Mixed ANOVA with frequency band (δ, θ or σ) as within factor and virus (eYFP or ChR2) as between factor	F (2, 34) = 14.3235	P = 0.0000	ηg2 = 0.4573	δ, eYFP vs ChR2	Pairwise t-tests with Holm-Bonferroni correction	T(14.8845) = -3.2536	P = 0.0162	Hedges' g = -1.4533	Two-tailed	eYFP n = 8 ChR2 n = 11	Mice
					θ, eYFP vs ChR2		T(13.0262) = 2.2106	P = 0.0911	Hedges' g = 1.0184	Two-tailed
					σ, eYFP vs ChR2		T(13.1542) = 2.0046	P = 0.0911	Hedges' g = 0.9216	Two-tailed
Ext. Data 2h, top	Two way RM-ANOVA with frequency band (δ, θ or σ) and laser (OFF or ON) as within factors	Laser, F(1, 10) = 9.1117 Interaction, F(2, 20) = 16.4513	Laser, P = 0.0129 Interaction, P = 0.0017	Laser, ηg2 = 0.0030 Interaction, ηg2 = 0.0182	δ, laser OFF vs ON	Pairwise t-tests with Holm-Bonferroni correction	T(10) = -4.8557	P = 0.0020	Hedges' g = -0.2960	Two-tailed	n = 11	Mice
					θ, laser OFF vs ON		T(10) = 0.9835	P = 0.3486	Hedges' g = 0.1026	Two-tailed
					σ, laser OFF vs ON		T(10) = 2.8446	P = 0.0348	Hedges' g = 0.1978	Two-tailed
Ext. Data 2h, bottom	Mixed ANOVA with frequency band (δ, θ or σ) as within factor and virus (eYFP or ChR2) as between factor	F (2, 34) = 7.4073	P = 0.0021	ηg2 = 0.3035	δ, eYFP vs ChR2	Pairwise t-tests with Holm-Bonferroni correction	T(13.0712) = -3.7106	P = 0.0078	Hedges' g = -1.4447	Two-tailed	eYFP n = 8 ChR2 n = 11	Mice
					θ, eYFP vs ChR2		T(10.6179) = 0.8034	P = 0.4394	Hedges' g = 0.3040	Two-tailed
					σ, eYFP vs ChR2		T(12.2243) = 1.7313	P = 0.2171	Hedges' g = 0.6674	Two-tailed
Ext. Data 2i, top	Two way RM-ANOVA with state (REM, Wake or NREM) and laser (OFF or ON) as within factors	Laser, F(1, 10) = 6.4911 Interaction, F(2, 20) = 4.8429	Laser, P = 0.0290 Interaction, P = 0.0421	Laser, ηg2 = 0.0021 Interaction, ηg2 = 0.0029	REM, laser OFF vs ON	Pairwise t-tests with Holm-Bonferroni correction	T(10) = 1.4465	P = 0.3573	Hedges' g = 0.0497	Two-tailed	n = 11	Mice
					Wake, laser OFF vs ON		T(10) = 2.4160	P = 0.1089	Hedges' g = 0.1877	Two-tailed
					NREM, laser OFF vs ON		T(10) = -0.6158	P = 0.5518	Hedges' g = -0.0087	Two-tailed
Ext. Data 2i, bottom	Mixed ANOVA with state (REM, Wake or NREM) as within factor and virus (eYFP or ChR2) as between factor	F (2, 34) = 3.2080	P = 0.0529	ηg2 = 0.1587	REM, eYFP vs ChR2	Pairwise t-tests with Holm-Bonferroni correction	-	-	-	-	eYFP n = 8 ChR2 n = 11	Mice
					Wake, eYFP vs ChR2
					NREM, eYFP vs ChR2
Ext. Data 3a	Two way RM-ANOVA with frequency band (δ, θ or σ) and laser (OFF or ON) as within factors	Laser, F(1, 10) = 12.2812 Interaction, F(2, 20) = 23.7170	Laser, P = 0.0057 Interaction, P = 0.0001	Laser, ηg2 = 0.0070 Interaction, ηg2 = 0.0307	δ, laser OFF vs ON	Pairwise t-tests with Holm-Bonferroni correction	T(10) = -3.2036	P = 0.0094	Hedges' g = -0.4886	Two-tailed	n = 11	Mice
					θ, laser OFF vs ON		T(10) = 4.9996	P = 0.0011	Hedges' g = 0.3324	Two-tailed
					σ, laser OFF vs ON		T(10) = 5.8398	P = 0.0005	Hedges' g = 0.4977	Two-tailed
Ext Data 3b	Mixed ANOVA with frequency band (δ, θ or σ) as within factor and virus (eYFP or ChR2) as between factor	F(2, 34) = 19.4547	P = 0.0000	ηp2= 0.5337	δ, eYFP vs ChR2	Pairwise t-tests with Holm-Bonferroni correction	T(11.8876) = -3.9289	P = 0.0041	Hedges' g = -1.5087	Two-tailed	eYFP n = 8 ChR2 n = 11	Mice
					θ, eYFP vs ChR2		T(14.1346) = 4.6247	P = 0.0012	Hedges' g = 1.8239	Two-tailed
					σ, eYFP vs ChR2		T(15.2431) = 2.3438	P = 0.0330	Hedges' g = 1.0401	Two-tailed
Ext. Data 3c	One way RM-ANOVA with laser (baseline (Bsl), OFF or ON) as within factor	F(2, 10) = 30.8403	P = 0.0001	ηg2 = 0.6753	Bsl vs laser OFF	Pairwise t-tests with Holm-Bonferroni correction	T(5) = -3.1538	P = 0.0253	Hedges' g = -0.7294	Two-tailed	n = 6	Mice
					Bsl vs laser ON		T(5) = 5.5197	P = 0.0054	Hedges' g = 2.1655	Two-tailed
					laser OFF vs laser ON		T(5) = 6.0387	P = 0.0054	Hedges' g = 2.9336	Two-tailed
Ext. Data 3e	Two way RM-ANOVA with frequency band (δ, θ or σ) and laser (OFF or ON) as within factors	Laser, F(1, 7) = 70.1733 Interaction, F(2, 14) = 63.4522	Laser, P = 0.0001 Interaction, P = 0.0000	Laser, ηg2 = 0.0388 Interaction, ηg2= 0.0768	δ, laser OFF vs ON	Pairwise t-tests with Holm-Bonferroni correction	T(7) = 1.4926	P = 0.1792	Hedges' g = 0.2353	Two-tailed	n = 8	Mice
					θ, laser OFF vs ON		T(7) = -9.3558	P = 0.0001	Hedges' g = -0.6493	Two-tailed
					σ, laser OFF vs ON		T(7) = -3.2495	P = 0.0281	Hedges' g = -0.2468	Two-tailed
Ext Data 3f	Mixed ANOVA with frequency band (δ, θ or σ) as within factor and virus (eYFP or iC++) as between factor	F(2, 28) = 35.5089	P = 0.0000	ηp2 = 0.7172	δ, eYFP vs iC++	Pairwise t-tests with Holm-Bonferroni correction	T(14) = 0.1347	P = 0.8948	Hedges' g = 0.0637	Two-tailed	eYFP n = 8 iC++ n = 8	Mice
					θ, eYFP vs iC++		T(14) = -7.3546	P = 0.0000	Hedges' g = -3.4767	Two-tailed
					σ, eYFP vs iC++		T(14) = -3.9499	P = 0.0029	Hedges' g = -1.8672	Two-tailed
Ext. Data 3g	One way RM-ANOVA with laser (Bsl, OFF or ON) as within factor	F(2, 14) = 28.3962	P = 0.0000	ηg2 = 0.2667	Bsl vs laser OFF	Pairwise t-tests with Holm-Bonferroni correction	T(7) = 3.8900	P = 0.0120	Hedges' g = 0.5860	Two-tailed	n = 8	Mice
					Bsl vs laser ON		T(7) = -3.6749	P = 0.0120	Hedges' g = -0.7136	Two-tailed
					laser OFF vs laser ON		T(7) = -7.8234	P = 0.0003	Hedges' g = -1.2836	Two-tailed
Ext. Data 3h					Peak frequency
	Two way RM-ANOVA with type (tonic or phasic) and laser (OFF or ON) as within factors	Type, F(1, 7) = 201.4563 Interaction, F(1, 7) = 1.3404	Type, P = 0.0000 Interaction, P = 0.2849	Type, ηg2 = 0.9399 Interaction, ηg2 = 0.0183	Laser OFF, tonic vs phasic	Pairwise t-tests with Holm-Bonferroni correction	T(7) = 14.3457	P = 0.0000	Hedges' g = 7.7452	Two-tailed	n = 8	Mice
					Laser ON, tonic vs phasic		T(7) = 12.2152	P = 0.0000	Hedges' g = 6.4989	Two-tailed
					EEG θ power
	Two way RM-ANOVA with type (tonic or phasic) and laser (OFF or ON) as within factors	Type, F(1, 7) = 64.2121 Interaction, F(1, 7) = 3.7150	Type, P = 0.0001 Interaction, P = 0.0953	Type, ηg2 = 0.4114 Interaction, ηg2 = 0.0060	Laser OFF, tonic vs phasic	Pairwise t-tests with Holm-Bonferroni correction	T(7) = 7.4373	P = 0.0003	Hedges' g = 1.5960	Two-tailed	n = 8	Mice
					Laser ON, tonic vs phasic		T(7) = 7.6072	P = 0.0003	Hedges' g = 1.3585	Two-tailed
Ext. Data 3i	Two way RM-ANOVA with type (tonic or phasic) and laser (OFF or ON) as within factors	Type, F(1, 4) = 21.0867 Interaction, F(1, 4) = 0.8241	Type, P = 0.0101 Interaction, P = 0.4153	Type, ηg2 = 0.6349 Interaction, ηg2 = 0.0039	Laser OFF, tonic vs phasic	Pairwise t-tests with Holm-Bonferroni correction	T(4) = 3.8561	P = 0.0182	Hedges' g = 2.1346	Two-tailed	n = 5	Mice
					Laser ON, tonic vs phasic		T(4) = 5.2877	P = 0.0123	Hedges' g = 2.1319	Two-tailed
Ext. Data 3j	-	-	-	-	Frequency of phasic θ events	Robust regression	T = -7.9828	P = 0.0000	-	-	n = 14	Mice
Ext. Data 3k	One way ANOVA with REM bout duration with within factor	F(3, 31) = 0.2850	P = 0.8359	ηp2 = 0.0268	REM duration, eYFP1 vs ChR2 vs eYFP2 vs iC++	-	-	-	-	-	eYFP1 n = 8 ChR2 n = 11 eYFP2 n = 8 iC++ n = 8	Mice
Ext. Data 4d, left	-	-	-	-	Frequency of all Ems, phasic θ vs tonic θ	Paired t-test	T(11) = -24.4617	P = 0.0000	Cohen's d = 8.6348	Two-tailed	n = 12	Mice
Ext. Data 4d, right	-	-	-	-	Frequency of EM bursts, phasic θ vs tonic θ	Paired t-test	T(11) = -16.6894	P = 0.0000	Cohen's d = 5.4243	Two-tailed	n = 12	Mice
Ext. Data 4e	One way RM-ANOVA with laser (Bsl, OFF or ON) as within factor	F(2, 10) = 40.0540	P = 0.0000	ηg2 = 0.7977	Bsl vs laser OFF	Pairwise t-tests with Holm-Bonferroni correction	T(5) = -1.4646	P = 0.2029	Hedges' g = -0.8698	Two-tailed	n = 6	Mice
					Bsl vs laser ON		T(5) = 7.1660	P = 0.0016	Hedges' g = 3.1488	Two-tailed
					laser OFF vs laser ON		T(5) = 10.0991	P = 0.0005	Hedges' g = 3.5416	Two-tailed
Ext. Data 4f	One way RM-ANOVA with laser (Bsl, OFF or ON) as within factor	F(2, 10) = 14.2330	P = 0.0012	ηg2= 0.7034	Bsl vs laser OFF	Pairwise t-tests with Holm-Bonferroni correction	T(5) = -1.8839	P = 0.1183	Hedges' g = -1.0662	Two-tailed	n = 6	Mice
					Bsl vs laser ON		T(5) = 3.3051	P = 0.0427	Hedges' g = 2.0537	Two-tailed
					laser OFF vs laser ON		T(5) = 4.6170	P = 0.0173	Hedges' g = 2.6685	Two-tailed
Ext. Data 4g, left	One way RM-ANOVA with laser (Bsl, OFF or ON) as within factor	F(2, 10) = 11.9441	P = 0.0140	ηg2 = 0.6530	Bsl vs laser OFF	Pairwise t-tests with Holm-Bonferroni correction	T(5) = -3.3121	P = 0.0483	Hedges' g = -2.1121	Two-tailed	n = 6	Mice
					Bsl vs laser ON		T(5) = 3.2386	P = 0.0483	Hedges' g = 1.4341	Two-tailed
					laser OFF vs laser ON		T(5) = 3.5662	P = 0.0483	Hedges' g = 2.3596	Two-tailed
Ext. Data 4g, right	One way RM-ANOVA with laser (Bsl, OFF or ON) as within factor	F(2, 10) = 10.9916	P = 0.0030	ηg2 = 0.6227	Bsl vs laser OFF	Pairwise t-tests with Holm-Bonferroni correction	T(5) = -3.5474	P = 0.0493	Hedges' g = -2.2054	Two-tailed	n = 6	Mice
					Bsl vs laser ON		T(5) = 2.6991	P = 0.0493	Hedges' g = 1.1967	Two-tailed
					laser OFF vs laser ON		T(5) = 3.4872	P = 0.0493	Hedges' g = 2.2344	Two-tailed
Ext. Data 4h	One way RM-ANOVA with laser (Bsl, OFF or ON) as within factor	F(2, 10) = 3.5544	P = 0.0682	ηg2 = 0.3844	Bsl vs laser OFF vs laser ON	-	-	-	-	-	n = 6	Mice
Ext. Data 4i	One way RM-ANOVA with laser (Bsl, OFF or ON) as within factor	F(2, 10) = 9.3425	P = 0.0051	ηg2 = 0.2567	Bsl vs laser OFF	Pairwise t-tests with Holm-Bonferroni correction	T(5) = 1.8605	P = 0.1219	Hedges' g = 0.6269	Two-tailed	n = 6	Mice
					Bsl vs laser ON		T(5) = -3.3776	P = 0.0395	Hedges' g = -0.6620	Two-tailed
					laser OFF vs laser ON		T(5) = -4.4646	P = 0.0198	Hedges' g = -1.1175	Two-tailed
Ext. Data 4j	One way RM-ANOVA with laser (Bsl, OFF or ON) as within factor	F(2, 10) = 10.5615	P = 0.0034	ηg2 = 0.4801	Bsl vs laser OFF	Pairwise t-tests with Holm-Bonferroni correction	T(5) = 0.4297	P = 0.6853	Hedges' g = 0.1439	Two-tailed	n = 6	Mice
					Bsl vs laser ON		T(5) = -4.1336	P = 0.0272	Hedges' g = -1.5517	Two-tailed
					laser OFF vs laser ON		T(5) = -3.1720	P = 0.0495	Hedges' g = -1.6893	Two-tailed
Ext. Data 4k, left	One way RM-ANOVA with laser (Bsl, OFF or ON) as within factor	F(2, 10) = 38.5859	P = 0.0000	ηg2 = 0.7865	Bsl vs laser OFF	Pairwise t-tests with Holm-Bonferroni correction	T(5) = 2.8548	P = 0.0356	Hedges' g = 1.6799	Two-tailed	n = 6	Mice
					Bsl vs laser ON		T(5) = -5.8409	P = 0.0042	Hedges' g = -2.5621	Two-tailed
					laser OFF vs laser ON		T(5) = -10.1551	P = 0.0005	Hedges' g = -3.4685	Two-tailed
Ext. Data 4k, right	One way RM-ANOVA with laser (Bsl, OFF or ON) as within factor	F(2, 10) = 41.3372	P = 0.0000	ηg2 = 0.8092	Bsl vs laser OFF	Pairwise t-tests with Holm-Bonferroni correction	T(5) = 2.8631	P = 0.0353	Hedges' g = 1.6348	Two-tailed	n = 6	Mice
					Bsl vs laser ON		T(5) = -5.6507	P = 0.0048	Hedges' g = -2.9052	Two-tailed
					laser OFF vs laser ON		T(5) = -11.5737	P = 0.0003	Hedges' g = -3.7790	Two-tailed
Ext. Data 4l	One way RM-ANOVA with laser (Bsl, OFF or ON) as within factor	F(2, 10) = 0.2066	P = 0.8167	ηg2 = 0.0245	Bsl vs laser OFF vs laser ON	-	-	-	-	-	n = 6	Mice
Ext. Data 4m, left	Two way ANOVA with REM bout duration in 40 s time bins and laser (Bsl or ON) as within factor	Laser, F(1) = 32.3029 Interaction, F(3) = 4.5571	Laser, P = 0.0000 Interaction, P= 0.0036	Laser, ηp2 = 0.0501 Interaction, ηp2 = 0.0219	0 to 40 sec, Bsl vs laser ON	Pairwise t-tests with Holm-Bonferroni correction	T(67.0219) = 3.5274	P = 0.0023	Hedges' g = 0.7697	Two-tailed	Bsl n = 434 laser ON n = 240	REM episodes
					40 to 80 sec, Bsl vs laser ON		T(102.5697) = 3.7529	P = 0.0012	Hedges' g = 0.7089	Two-tailed
					80 to 120 sec, Bsl vs laser ON		T(80.4155) = 1.3690	P = 0.3496	Hedges' g = 0.2938	Two-tailed
					> 120 sec, Bsl vs laser ON		T(108.9575) = 0.0040	P = 0.9968	Hedges' g = 0.0007	Two-tailed
Ext. Data 4m, right	Two way ANOVA with REM bout duration in 40 s time bins and laser (Bsl or ON) as within factor	Laser, F(1) = 15.3059 Interaction, F(3) = 3.6181	Laser, P = 0.0001 Interaction, P = 0.0130	Laser, ηp2 = 0.0244 Interaction, ηp2 = 0.0174	0 to 40 sec, Bsl vs laser ON	Pairwise t-tests with Holm-Bonferroni correction	T(67.4194) = 2.7788	P = 0.0212	Hedges' g = 0.5989	Two-tailed	Bsl n = 434 laser ON n = 240	REM episodes
					40 to 80 sec, Bsl vs laser ON		T(99.0338) = 2.8766	P = 0.0197	Hedges' g = 0.5463	Two-tailed
					80 to 120 sec, Bsl vs laser ON		T(80.0769) = 0.7768	P = 0.8791	Hedges' g = 0.1668	Two-tailed
					> 120 sec, Bsl vs laser ON		T(109.9569) = -0.4635	P = 0.8791	Hedges' g = -0.0868	Two-tailed
Ext. Data 4n, left	Two way ANOVA with REM bout duration in 40 s time bins and laser (Bsl or ON) as within factor	Laser, F(1) = 13.4937 Interaction, F(3) = 4.2867	Laser, P = 0.0003 Interaction, P = 0.0052	Laser, ηp2 = 0.0195 Interaction, ηp2 = 0.0186	0 to 40 sec, Bsl vs laser ON	Pairwise t-tests with Holm-Bonferroni correction	T(298.8122) = -1.3899	P = 0.1656	Hedges' g = -0.1374	Two-tailed	Bsl n = 501 laser ON n = 216	REM episodes
					40 to 80 sec, Bsl vs laser ON		T(56.7607) = -2.1458	P = 0.0724	Hedges' g = -0.4181	Two-tailed
					80 to 120 sec, Bsl vs laser ON		T(22.4919) = -2.7307	P = 0.0362	Hedges' g = -0.8452	Two-tailed
					> 120 sec, Bsl vs laser ON		T(17.3269) = -3.5925	P = 0.0088	Hedges' g = -0.9888	Two-tailed
Ext. Data 4n, right	Two way ANOVA with REM bout duration in 40 s time bins and laser (Bsl or ON) as within factor	Laser, F(1) = 12.7678 Interaction, F(3) = 5.1000	Laser, P = 0.0004 Interaction, P = 0.0017	Laser, ηp2 = 0.0184 Interaction, ηp2 = 0.0220	0 to 40 sec, Bsl vs laser ON	Pairwise t-tests with Holm-Bonferroni correction	T(295.1819) = -1.1743	P = 0.2412	Hedges' g = -0.1166	Two-tailed	Bsl n = 501 laser ON n = 216	REM episodes
					40 to 80 sec, Bsl vs laser ON		T(49.6007) = -1.7661	P = 0.1671	Hedges' g = -0.3728	Two-tailed
					80 to 120 sec, Bsl vs laser ON		T(25.7519) = -3.2621	P = 0.0096	Hedges' g = -0.9236	Two-tailed
					> 120 sec, Bsl vs laser ON		T(17.1432) = -3.5563	P = 0.0096	Hedges' g = -0.9852	Two-tailed
Ext. Data 5c	Two way RM-ANOVA with states (REM, Wake, or NREM) and laser (baseline or laser) as within factors	F(2, 12) = 2.7777	P = 0.1228	ηg2 = 0.0531	REM, baseline vs laser	Pairwise t-tests with Holm-Bonferroni correction	-	-	-	-	n = 7	Mice
					Wake, baseline vs laser		-	-	-	-
					NREM, baseline vs laser		-	-	-	-
Ext. Data 5d	-	-	-	-	REM to REM	Bootstrap	-	P = 0.0001	md = -0.0976, CI = [-0.1417, -0.0516]	Two-tailed	n = 8	Mice
					Wake to Wake			P = 0.0234	md = -0.0287, CI = [-0.0531, -0.0037]	Two-tailed
					NREM to NREM			P = 0.0004	md = 0.0373, CI = [0.0161, 0.0584]	Two-tailed
Ext. Data 5e	-	-	-	-	NREM to REM	Bootstrap	-	P = 0.0001	md = -0.0516, CI = [-0.0724, -0.0312]	Two-tailed	eYFP n = 7 ChR2 n = 8	Mice
					REM to Wake			P = 0.0318	md = 0.0789, CI = [0.0071, 0.1498]	Two-tailed
					NREM to Wake			P = 0.6890	md = 0.0057, CI = [-0.0222, -0.0341]	Two-tailed
					Wake to NREM			P = 0.0300	md = 0.0373, CI = [0.0039, 0.0711]	Two-tailed
					REM to REM			P = 0.0318	md = -0.0789, CI = [-0.1498, -0.0071]	Two-tailed
					Wake to Wake			P = 0.0272	md = -0.0376, CI = [-0.0715, -0.0042]	Two-tailed
					NREM to NREM			P = 0.0014	md = 0.0459, CI = [0.0164, 0.0753]	Two-tailed
Ext. Data 5f	Two way RM-ANOVA with frequency band (δ, θ or σ) and laser (OFF or ON) as within factors	Laser, F(1, 7) = 10.7450 Interaction, F(2, 14) = 33.8268	Laser, P = 0.0135 Interaction, P = 0.0002	Laser, ηg2 = 0.0379 Interaction, ηg2 = 0.1098	δ, laser OFF vs ON	Pairwise t-tests with Holm-Bonferroni correction	T(7) = 4.1959	P = 0.0068	Hedges' g = 0.9643	Two-tailed	n = 8	Mice
					θ, laser OFF vs ON		T(7) = -4.8064	P = 0.0059	Hedges' g = -0.6898	Two-tailed
					σ, laser OFF vs ON		T(7) = -4.3379	P = 0.0068	Hedges' g = -0.9466	Two-tailed
Ext. Data 5g	Mixed ANOVA with frequency band (δ, θ or σ) as within factor and virus (eYFP or ChR2) as between factor	F(2, 26) = 34.4599	P = 0.0000	ηp2= 0.7261	δ, eYFP vs ChR2	Pairwise t-tests with Holm-Bonferroni correction	T(7.9401) = 4.0659	P = 0.0073	Hedges' g = 1.8586	Two-tailed	eYFP n = 7 ChR2 n = 8	Mice
					θ, eYFP vs ChR2		T(7.7820) = -5.3689	P = 0.0022	Hedges' g = -2.4510	Two-tailed
					σ, eYFP vs ChR2		T(8.3382) = -3.9745	P = 0.0073	Hedges' g = -1.8226	Two-tailed
Ext. Data 7c	Two way RM-ANOVA with states (REM, Wake, or NREM) and laser (baseline or laser) as within factors	F(2, 14) = 49.4503	P = 0.0000	ηg2 = 0.2996	REM, baseline vs laser	Pairwise t-tests with Holm-Bonferroni correction	T(7) = 6.7383	P = 0.0005	Hedges' g = 2.3799	Two-tailed	n = 8	Mice
					Wake, baseline vs laser		T(7) = 3.0582	P = 0.0184	Hedges' g = 0.4093	Two-tailed
					NREM, baseline vs laser		T(7) = -9.5021	P = 0.0001	Hedges' g = -1.3865	Two-tailed
Ext. Data 7e, bottom	Two way RM-ANOVA with frequency band (δ, θ, or γ) and laser (baseline or laser) as within factors	F(2, 14) = 122.4884	P = 0.0000	ηg2 = 0.7879	δ, baselinve vs laser	Pairwise t-tests with Holm-Bonferroni correction	T(7) = -11.8335	P = 0.0000	Hedges' g = -3.9363	Two-tailed	n = 8	Mice
					θ, baseline vs laser		T(7) = 5.1560	P = 0.0013	Hedges' g = 2.2171	Two-tailed
					γ, baseline vs laser		T(7) = 9.7186	P = 0.0001	Hedges' g = 3.7125	Two-tailed
Ext. Data 7f	-	-	-	-	Laser OFF vs laser ON	Paired t-test	T(7) = 6.4943	P = 0.0003	Cohen's d = 2.7791	Two-tailed	n = 8	Mice
Ext. Data 7g	-	-	-	-	Laser OFF vs laser ON	Paired t-test	T(7) = 6.0544	P = 0.0005	Cohen's d = 2.7703	Two-tailed	n = 8	Mice
Ext. Data 7j	Two way RM-ANOVA with states (REM, Wake, or NREM) and laser (baseline or laser) as within factors	F(2, 12) = 3.2145	P = 0.1145	ηg2 = 0.0870	REM, baseline vs laser	Pairwise t-tests with Holm-Bonferroni correction	-	-	-	-	n = 7	Mice
					Wake, baseline vs laser		-	-	-	-
					NREM, baseline vs laser		-	-	-	-
Ext. Data 7k	-	-	-	-	Laser OFF vs laser ON	Paired t-test	T(6) = 0.8830	P = 0.4112	Cohen's d = 0.4738	Two-tailed	n = 7	Mice
Ext. Data 7l	-	-	-	-	Laser OFF vs laser ON	Paired t-test	T(6) = 0.2519	P = 0.8095	Cohen's d = 0.1196	Two-tailed	n = 7	Mice
Ext. Data 7o	Two way RM-ANOVA with states (REM, Wake, or NREM) and laser (baseline or laser) as within factors	F(2, 12) = 0.2381	P = 0.7918	ηg2 = 0.0022	REM, baseline vs laser	Pairwise t-tests with Holm-Bonferroni correction	-	-	-	Two-tailed	n = 7	Mice
					Wake, baseline vs laser		-	-	-	Two-tailed
					NREM, baseline vs laser		-	-	-	Two-tailed
Ext. Data 7p	-	-	-	-	Laser OFF vs laser ON	Paired t-test	T(6) = 0.2303	P = 0.8255	Cohen's d = 0.0764	Two-tailed	n = 7	Mice
Ext. Data 7q	-	-	-	-	Laser OFF vs laser ON	Paired t-test	T(6) = 2.0832	P = 0.0824	Cohen's d = 1.3009	Two-tailed	n = 7	Mice
Ext. Data 7t	Two way RM-ANOVA with states (REM, Wake, or NREM) and laser (baseline or laser) as within factors	F(2, 10) = 3.5285	P = 0.1030	ηg2 = 0.1118	REM, baseline vs laser	Pairwise t-tests with Holm-Bonferroni correction	-	-	-	Two-tailed	n = 6	Mice
					Wake, baseline vs laser		-	-	-	Two-tailed
					NREM, baseline vs laser		-	-	-	Two-tailed
Ext. Data 7u	-	-	-	-	Laser OFF vs laser ON	Paired t-test	T(5) = 0.7501	P = 0.4870	Cohen's d = 0.2337	Two-tailed	n = 6	Mice
Ext. Data 7v	-	-	-	-	Laser OFF vs laser ON	Paired t-test	T(5) = 1.7043	P = 0.1491	Cohen's d = 0.7871	Two-tailed	n = 6	Mice
Ext. Data 8b, bottom	Two way RM-ANOVA with frequency band (δ, θ, or γ) and laser (baseline or laser) as within factors	F(2, 18) = 39.0486	P = 0.0001	ηg2 = 0.5826	δ, baselinve vs laser	Pairwise t-tests with Holm-Bonferroni correction	T(9) = -5.7740	P = 0.0005	Hedges' g = -1.9620	Two-tailed	n = 10	Mice
					θ, baseline vs laser		T(9) = 5.7860	P = 0.0005	Hedges' g = 2.1550	Two-tailed
					γ, baseline vs laser		T(9) = 6.1867	P = 0.0005	Hedges' g = 2.6270	Two-tailed
Ext. Data 8d	Two way RM-ANOVA with states (REM, Wake, or NREM) and laser (baseline or laser) as within factors	F(2, 16) = 0.7429	P = 0.4312	ηg2 = 0.0089	REM, baseline vs laser	Pairwise t-tests with Holm-Bonferroni correction	-	-	-	-	n = 9	Mice
					Wake, baseline vs laser		-	-	-	-
					NREM, baseline vs laser		-	-	-	-
Ext. Data 8e	Mixed ANOVA with state (REM, Wake or NREM) as within factor and virus (eYFP or ChR2) as between factor	F(2, 34) = 25.9368	P = 0.0000	ηp2 = 0.6041	REM, eYFP vs ChR2	Pairwise t-tests with Holm-Bonferroni correction	T(9.8597) = 6.1353	P = 0.0004	Hedges' g = 2.5588	Two-tailed	eYFP n = 9 ChR2 n = 10	Mice
					Wake, eYFP vs ChR2		T(16.1777) = -1.1041	P = 0.2857	Hedges' g = -0.4877	Two-tailed
					NREM, eYFP vs ChR2		T(12.9487) = -4.9850	P = 0.0005	Hedges' g = -2.1103	Two-tailed
Ext. Data 8f	-	-	-	-	REM to REM	Bootstrap	-	P = 0.0001	md = 0.0979, CI = [0.0552, 0.1399]	Two-tailed	n = 10	Mice
					Wake to Wake			P = 0.8396	md = 0.0017, CI = [-0.0155, 0.0185]	Two-tailed
					NREM to NREM			P = 0.0001	md = -0.1063, CI = [-0.1258, -0.0865]	Two-tailed
Ext. Data 8g	-	-	-	-	NREM to REM	Bootstrap	-	P = 0.0001	md = 0.1413, CI = [0.1171, 0.1651]	Two-tailed	n = 10	Mice
					REM to Wake			P = 0.0001	md = -0.1214, CI = [-0.1825, -0.0603]	Two-tailed
					NREM to Wake			P = 0.0100	md = -0.0317, CI = [-0.0563, -0.0076]	Two-tailed
					Wake to NREM			P = 0.8448	md = 0.0029, CI = [-0.0242, 0.0298]	Two-tailed
					REM to REM			P = 0.0001	md = 0.1214, CI = [0.0603, 0.1825]	Two-tailed
					Wake to Wake			P = 0.8364	md = -0.0030, CI = [-0.0298, 0.0239]	Two-tailed
					NREM to NREM			P = 0.0001	md = -0.1096, CI = [-0.1378, -0.0820]	Two-tailed
Ext. Data 8h	One way RM-ANOVA with laser (Bsl, OFF or ON) as within factor	F(2, 14) = 40.5648	P = 0.0000	ηg2 = 0.8157	Bsl vs laser OFF	Pairwise t-tests with Holm-Bonferroni correction	T(7) = -4.6306	P = 0.0024	Hedges' g = -2.1486	Two-tailed	n = 8	Mice
					Bsl vs laser ON		T(7) = 5.7142	P = 0.0014	Hedges' g = 2.7472	Two-tailed
					laser OFF vs laser ON		T(7) = 7.2278	P = 0.0005	Hedges' g = 3.9270	Two-tailed
Ext. Data 8i	Two way RM-ANOVA with frequency band (δ, θ, or σ) as within factor and virus (eYFP or ChR2) as between factor	F(2, 34) = 13.1137	P = 0.0001	ηp2= 0.4355	δ, eYFP vs ChR2	Pairwise t-tests with Holm-Bonferroni correction	T(16.0408) = -4.1937	P = 0.0021	Hedges' g = -1.8051	Two-tailed	eYFP n = 9 ChR2 n = 10	Mice
					θ, eYFP vs ChR2		T(16.8044) = 2.4380	P = 0.0524	Hedges' g = 1.0572	Two-tailed
					σ, eYFP vs ChR2		T(16.0789) = 1.5610	P = 0.1380	Hedges' g = 0.6900	Two-tailed
Ext. Data 9b, bottom	Two way RM-ANOVA with frequency band (δ, θ, or γ) and laser (baseline or laser) as within factors	F(2, 18) = 19.1039	P = 0.0004	ηg2 = 0.2631	δ, baselinve vs laser	Pairwise t-tests with Holm-Bonferroni correction	T(9) = 3.1504	P = 0.0117	Hedges' g = 0.8213	Two-tailed	n = 10	Mice
					θ, baseline vs laser		T(9) = -4.9723	P = 0.0023	Hedges' g = -1.9073	Two-tailed
					γ, baseline vs laser		T(9) = -4.7161	P = 0.0023	Hedges' g = -1.3150	Two-tailed
Ext. Data 9d	Two way RM-ANOVA with states (REM, Wake, or NREM) and laser (baseline or laser) as within factors	F(2, 14) = 1.7494	P = 0.2183	ηg2 = 0.0298	REM, baseline vs laser	Pairwise t-tests with Holm-Bonferroni correction	-	-	-	-	n = 8	Mice
					Wake, baseline vs laser		-	-	-	-
					NREM, baseline vs laser		-	-	-	-
Ext. Data 9e	Mixed ANOVA with state (REM, Wake or NREM) as within factor and virus (eYFP or iC++) as between factor	F(2, 32) = 5.6931	P = 0.0077	ηp2 = 0.2624	REM, eYFP vs ChR2	Pairwise t-tests with Holm-Bonferroni correction	T(14.0865) = -4.6096	P = 0.0012	Hedges' g = -2.1154	Two-tailed	eYFP n = 8 iC++ n = 10	Mice
					Wake, eYFP vs ChR2		T(13.3652) = 2.5724	P = 0.0456	Hedges' g = 1.0781	Two-tailed
					NREM, eYFP vs ChR2		T(14.0576) = 1.0088	P = 0.3301	Hedges' g = 0.4260	Two-tailed
Ext. Data 9f	-	-	-	-	REM to REM	Bootstrap	-	P = 0.0622	md = -0.0361, CI = [-0.0727, 0.0015]	Two-tailed	eYFP n = 8 iC++ n = 10	Mice
					Wake to Wake			P = 0.3630	md = 0.0087, CI = [-0.0104, 0.0272]	Two-tailed
					NREM to NREM			P = 0.4758	md = 0.0058, CI = [-0.0102, 0.0218]	Two-tailed
Ext. Data 9g	-	-	-	-	NREM to REM	Bootstrap	-	P = 0.0032	md = -0.0328, CI = [-0.0534, -0.0122]	Two-tailed	eYFP n = 8 iC++ n = 10	Mice
					REM to Wake			P = 0.6490	md = 0.0133, CI = [-0.0436, 0.0689]	Two-tailed
					NREM to Wake			P = 0.0388	md = 0.0239, CI = [0.0013, 0.0464]	Two-tailed
					Wake to NREM			P = 0.7432	md = 0.0044, CI = [-0.0222, 0.0307]	Two-tailed
					REM to REM			P = 0.6490	md = -0.0133, CI = [-0.0689, 0.0436]	Two-tailed
					Wake to Wake			P = 0.7432	md = -0.0044, CI = [-0.0307, 0.0222]	Two-tailed
					NREM to NREM			P = 0.4762	md = 0.0089, CI = [-0.0158, 0.0333]	Two-tailed
Ext. Data 9h	One way RM-ANOVA with laser (Bsl, OFF or ON) as within factor	F(2, 8) = 7.1556	P = 0.0165	ηg2 = 0.5340	Bsl vs laser OFF	Pairwise t-tests with Holm-Bonferroni correction	T(4) = 1.0991	P = 0.3334	Hedges' g = 0.6433	Two-tailed	n = 5	Mice
					Bsl vs laser ON		T(4) = -6.1348	P = 0.0107	Hedges' g = -2.4217	Two-tailed
					laser OFF vs laser ON		T(4) = -3.2630	P = 0.0620	Hedges' g = -1.8422	Two-tailed
Ext. Data 9i	Two way RM-ANOVA with frequency band (δ, θ, or σ) as within factor and virus (eYFP or iC++) as between factor	F(2, 32) = 3.2876	P = 0.0503	ηp2= 0.1705	δ, eYFP vs iC++	Pairwise t-tests with Holm-Bonferroni correction	-	-	-	Two-tailed	eYFP n = 8 iC++ n = 10	Mice
					θ, eYFP vs iC++		-	-	-	Two-tailed
					σ, eYFP vs iC++		-	-	-	Two-tailed
Ext. Data 9l	-	-	-	-	REM, mCherry vs hM4D(Gi)	T-test	T(9.1717) = -4.0164	P = 0.0029	Cohen's d = 2.1608	Two-tailed	mCherry n = 7 hM4D(Gi) n = 9	Mice
	-	-	-	-	Wake, mCherry vs hM4D(Gi)	T-test	T(13.9555) = -1.6496	P = 0.1213	Cohen's d = 0.7970	Two-tailed	mCherry n = 7 hM4D(Gi) n = 9	Mice
	-	-	-	-	NREM, mCherry vs hM4D(Gi)	T-test	T(13.8586) = 2.5041	P = 0.0254	Cohen's d = 1.2032	Two-tailed	mCherry n = 7 hM4D(Gi) n = 9	Mice
	-	-	-	-	ratio, mCherry vs hM4D(Gi)	T-test	T(9.2758) = -4.9796	P = 0.0007	Cohen's d = 2.6741	Two-tailed	mCherry n = 7 hM4D(Gi) n = 9	Mice
Ext. Data 9m	-	-	-	-	REM bout duration, mCherry vs hM4D(Gi)	T-test	T(12.4994) = -2.4769	P = 0.0285	Cohen's d = 1.1554	Two-tailed	mCherry n = 7 hM4D(Gi) n = 9	Mice
	-	-	-	-	REM frequency, mCherry vs hM4D(Gi)	T-test	T(11.8419) = -0.9985	P = 0.3380	Cohen's d = 0.5141	Two-tailed	mCherry n = 7 hM4D(Gi) n = 9	Mice
Ext. Data 9n	-	-	-	-	Frequency of phasic θ events, mCherry vs hM4D(Gi)	T-test	T(12.8026) = -3.3576	P = 0.0052	Cohen's d = 1.7001	Two-tailed	mCherry n = 7 hM4D(Gi) n = 9	Mice
Ext. Data 10b, left	-	-	-	-	θ, R>W>N	One-sample t-test	T(35) = -2.9321	P = 0.0059	Cohen's d = 0.4887	Two-tailed	n = 36	Cells
					θ, R>N>W	One-sample t-test	T(42) = 8.2686	P = 0.0000	Cohen's d = 1.2609	Two-tailed	n = 43	Cells
					θ, W-max	One-sample t-test	T(33) = -7.3635	P = 0.0000	Cohen's d = 1.2628	Two-tailed	n = 34	Cells
Ext. Data 10b, right	-	-	-	-	σ, R>W>N	One-sample t-test	T(35) = -4.1030	P = 0.0002	Cohen's d = 0.6838	Two-tailed	n = 36	Cells
					σ, R>N>W	One-sample t-test	T(42) = 6.5703	P = 0.0000	Cohen's d = 1.0020	Two-tailed	n = 43	Cells
					σ, W-max	One-sample t-test	T(33) = -7.4953	P = 0.0000	Cohen's d = 1.2854	Two-tailed	n = 34	Cells
Ext. Data 10c, left	-	-	-	-	ΔF/F during REM	Robust regression	T = 3.6896	P = 0.0002	-	-	n = 212	REM episodes
											n = 36	Cells
Ext. Data 10c, right	-	-	-	-	ΔF/F during REM	Robust regression	T = -1.0721	P = 0.2836	-	-	n = 240	REM episodes
											n = 43	Cells
Ext. Data 10d	-	-	-	-	Pre vs post	Paired t-test	T(33) = 0.5646	P = 0.5761	Cohen's d = 0.0968	Two-tailed	n = 34	Cells
