# Supplementary material for: Prefrontal Cortical Regulation of REM Sleep
Source: Research Square preprint supplement (doi:10.21203/rs.3.rs-1417511/v1), 2023-10-10
Supplement: Supplementary file 2 [file e4112f875e054e933a44ae35.xlsx]

## Sheet: Supplementary Table 1
ID	Mouse	#Sessions	Recording duration (min)	Total REM (min)	Total Wake (min)	Total NREM (min)	#REM	#Wake	#NREM	REM duration	Wake duration	NREM duration	Type	DF/F (z-scored) for REM, Wake, NREM	F ANOVA	P ANOVA	Tukey (N~R, N~W, R~W)
0	J361	1	91.79	5	23.04	63.75	5	25	25	60	55.3	153	W-max	-0.16, 0.36, -0.11	F(2,98729)=2152.12	0	0.0, 0.0, 0.0
1	J361	1	91.79	5	23.04	63.75	5	25	25	60	55.3	153	R>W>N	0.33, 0.21, -0.11	F(2,98729)=1301.99	0	0.0, 0.0, 0.0
2	J361	1	91.79	5	23.04	63.75	5	25	25	60	55.3	153	N-max	-0.29, -0.18, 0.08	F(2,98729)=872.52	0	0.0, 0.0, 0.0
3	J361	1	91.79	5	23.04	63.75	5	25	25	60	55.3	153	N-max	-0.4, -0.17, 0.09	F(2,98729)=1089.46	0	0.0, 0.0, 0.0
4	J361	1	91.79	5	23.04	63.75	5	25	25	60	55.3	153	W-max	-0.6, 0.26, -0.06	F(2,98729)=2050.91	0	0.0, 0.0, 0.0
5	J361	1	91.79	5	23.04	63.75	5	25	25	60	55.3	153	R>W>N	0.62, 0.32, -0.18	F(2,98729)=3688.17	0	0.0, 0.0, 0.0
6	J361	1	91.79	5	23.04	63.75	5	25	25	60	55.3	153	W-max	-0.23, 0.21, -0.06	F(2,98729)=795.83	0	0.0, 0.0, 0.0
7	J361	1	91.79	5	23.04	63.75	5	25	25	60	55.3	153	N-max	-0.54, -0.03, 0.05	F(2,98729)=895.02	0	0.0, 0.0, 0.0
8	J361	1	91.79	5	23.04	63.75	5	25	25	60	55.3	153	N-max	-0.47, -0.02, 0.04	F(2,98729)=659.34	0	0.0, 0.0, 0.0
9	J361	1	91.79	5	23.04	63.75	5	25	25	60	55.3	153	W-max	-0.1, 0.52, -0.18	F(2,98729)=4922.6	0	0.0, 0.0, 0.0
10	J361	1	91.79	5	23.04	63.75	5	25	25	60	55.3	153	N-max	-0.71, -0.39, 0.2	F(2,98729)=5124.4	0	0.0, 0.0, 0.0
11	J361	1	91.79	5	23.04	63.75	5	25	25	60	55.3	153	W-max	-0.39, 0.74, -0.24	F(2,98729)=10891.63	0	0.0, 0.0, 0.0
12	J361	1	91.79	5	23.04	63.75	5	25	25	60	55.3	153	N-max	-0.32, -0.13, 0.07	F(2,98729)=642.73	0	0.0, 0.0, 0.0
13	J361	1	91.79	5	23.04	63.75	5	25	25	60	55.3	153	N-max	-0.22, -0.04, 0.03	F(2,98729)=181.25	0	0.0, 0.0, 0.0
14	J361	1	91.79	5	23.04	63.75	5	25	25	60	55.3	153	N-max	-0.32, -0.23, 0.11	F(2,98729)=1338.21	0	0.0, 0.0, 0.0
15	J361	1	91.79	5	23.04	63.75	5	25	25	60	55.3	153	W-max	-0.45, 0.29, -0.07	F(2,98729)=1835.59	0	0.0, 0.0, 0.0
16	J361	1	91.79	5	23.04	63.75	5	25	25	60	55.3	153	W-max	-0.22, 0.22, -0.07	F(2,98729)=968.06	0	0.0, 0.0, 0.0
17	J361	1	91.79	5	23.04	63.75	5	25	25	60	55.3	153	W-max	-0.5, 0.08, 0.01	F(2,98729)=740.86	0	0.0, 0.0, 0.0
18	J361	1	91.79	5	23.04	63.75	5	25	25	60	55.3	153	R>W>N	0.68, 0.05, -0.07	F(2,98729)=1480.52	0	0.0, 0.0, 0.0
19	J361	1	91.79	5	23.04	63.75	5	25	25	60	55.3	153	R>W>N	0.86, 0.14, -0.12	F(2,98729)=2867.78	0	0.0, 0.0, 0.0
20	J361	1	91.79	5	23.04	63.75	5	25	25	60	55.3	153	R>N>W	0.44, -0.33, 0.08	F(2,98729)=2140.94	0	0.0, 0.0, 0.0
21	J361	1	91.79	5	23.04	63.75	5	25	25	60	55.3	153	W-max	-0.28, 0.06, 0.0	F(2,98729)=259.75	0	0.0, 0.0, 0.0
22	J380	1	91.71	3.58	28.04	60.08	5	24	24	43	70.1042	150.208	R>N>W	0.66, -0.31, 0.1	F(2,97541)=2693.43	0	0.0, 0.0, 0.0
23	J380	1	91.71	3.58	28.04	60.08	5	24	24	43	70.1042	150.208	R>N>W	0.39, -0.33, 0.12	F(2,97541)=2523.32	0	0.0, 0.0, 0.0
24	J380	1	91.71	3.58	28.04	60.08	5	24	24	43	70.1042	150.208	R>N>W	0.27, -0.2, 0.07	F(2,97541)=926.46	0	0.0, 0.0, 0.0
25	J380	1	91.71	3.58	28.04	60.08	5	24	24	43	70.1042	150.208	R>W>N	0.94, 0.0, -0.06	F(2,97541)=1837.17	0	0.0, 0.0, 0.0
26	J380	1	91.71	3.58	28.04	60.08	5	24	24	43	70.1042	150.208	R>N>W	0.2, -0.27, 0.12	F(2,97541)=1620.38	0	0.0, 0.0, 0.0
27	J380	1	91.71	3.58	28.04	60.08	5	24	24	43	70.1042	150.208	R>N>W	0.31, -0.07, 0.01	F(2,97541)=246.05	0	0.0, 0.0, 0.0
28	J380	1	91.71	3.58	28.04	60.08	5	24	24	43	70.1042	150.208	R>N>W	0.36, -0.1, 0.01	F(2,97541)=414.07	0	0.0, 0.0, 0.0
29	J380	1	91.71	3.58	28.04	60.08	5	24	24	43	70.1042	150.208	R>N>W	0.4, -0.13, 0.04	F(2,97541)=585.18	0	0.0, 0.0, 0.0
30	J380	1	91.71	3.58	28.04	60.08	5	24	24	43	70.1042	150.208	R>N>W	0.94, -0.12, -0.01	F(2,97541)=2012.62	0	0.0, 0.0, 0.0
31	J380	1	91.71	3.58	28.04	60.08	5	24	24	43	70.1042	150.208	R>N>W	2.34, -0.16, -0.07	F(2,97541)=13945.15	0	0.0, 0.0, 0.0
32	J380	1	91.71	3.58	28.04	60.08	5	24	24	43	70.1042	150.208	R>W>N	0.24, 0.08, -0.05	F(2,97541)=297.06	0	0.0, 0.0, 0.0
33	J380	1	91.71	3.58	28.04	60.08	5	24	24	43	70.1042	150.208	R>W>N	0.58, 0.2, -0.14	F(2,97541)=1943.39	0	0.0, 0.0, 0.0
34	J380	1	91.71	3.58	28.04	60.08	5	24	24	43	70.1042	150.208	R>W>N	0.26, 0.14, -0.08	F(2,97541)=618.41	0	0.0, 0.0, 0.0
35	J380	1	91.71	3.58	28.04	60.08	5	24	24	43	70.1042	150.208	X	0.12, -0.24, 0.1	F(2,97541)=1257.67	0	0.33, 0.0, 0.0
36	J380	1	91.71	3.58	28.04	60.08	5	24	24	43	70.1042	150.208	R>N>W	1.01, -0.14, 0.0	F(2,97541)=2311.2	0	0.0, 0.0, 0.0
37	J380	1	91.71	3.58	28.04	60.08	5	24	24	43	70.1042	150.208	N-max	-0.43, -0.24, 0.13	F(2,97541)=1722.17	0	0.0, 0.0, 0.0
38	J380	1	91.71	3.58	28.04	60.08	5	24	24	43	70.1042	150.208	R>N>W	0.37, -0.13, 0.03	F(2,97541)=538.75	0	0.0, 0.0, 0.0
39	J380	1	91.71	3.58	28.04	60.08	5	24	24	43	70.1042	150.208	R>N>W	0.32, -0.07, 0.01	F(2,97541)=273.49	0	0.0, 0.0, 0.0
40	J380	1	91.71	3.58	28.04	60.08	5	24	24	43	70.1042	150.208	R>N>W	0.61, -0.06, -0.01	F(2,97541)=778.97	0	0.0, 0.0, 0.0
41	J380	1	91.71	3.58	28.04	60.08	5	24	24	43	70.1042	150.208	R>N>W	0.15, -0.15, 0.05	F(2,97541)=486.99	0	0.0, 0.0, 0.0
42	J380	1	91.71	3.58	28.04	60.08	5	24	24	43	70.1042	150.208	R>W>N	0.8, 0.09, -0.09	F(2,97541)=1649.29	0	0.0, 0.0, 0.0
43	J380	1	91.71	3.58	28.04	60.08	5	24	24	43	70.1042	150.208	R>W>N	0.84, 0.12, -0.11	F(2,97541)=2033.16	0	0.0, 0.0, 0.0
44	J382	1	90.04	3.33	19.17	67.54	4	21	21	50	54.7619	192.976	R>N>W	1.25, -0.15, -0.02	F(2,105488)=3440.68	0	0.0, 0.0, 0.0
45	J382	1	90.04	3.33	19.17	67.54	4	21	21	50	54.7619	192.976	R>N>W	0.48, -0.33, 0.07	F(2,105488)=1882.33	0	0.0, 0.0, 0.0
46	J382	1	90.04	3.33	19.17	67.54	4	21	21	50	54.7619	192.976	R>N>W	2.86, -0.21, -0.08	F(2,105488)=23576.55	0	0.0, 0.0, 0.0
47	J382	1	90.04	3.33	19.17	67.54	4	21	21	50	54.7619	192.976	R>N>W	1.33, -0.25, 0.01	F(2,105488)=4322.9	0	0.0, 0.0, 0.0
48	J382	1	90.04	3.33	19.17	67.54	4	21	21	50	54.7619	192.976	R>N>W	0.98, -0.42, 0.07	F(2,105488)=4235.41	0	0.0, 0.0, 0.0
49	J382	1	90.04	3.33	19.17	67.54	4	21	21	50	54.7619	192.976	R>N>W	0.48, -0.06, -0.02	F(2,105488)=506.61	0	0.0, 0.0, 0.0
50	J382	1	90.04	3.33	19.17	67.54	4	21	21	50	54.7619	192.976	N-max	0.02, -0.53, 0.14	F(2,105488)=4311.7	0	0.0, 0.0, 0.0
51	J382	1	90.04	3.33	19.17	67.54	4	21	21	50	54.7619	192.976	N-max	-0.03, -0.25, 0.08	F(2,105488)=937.82	0	0.0, 0.0, 0.0
52	J382	1	90.04	3.33	19.17	67.54	4	21	21	50	54.7619	192.976	R>N>W	0.12, -0.28, 0.07	F(2,105488)=1113.59	0	0.01, 0.0, 0.0
53	J382	1	90.04	3.33	19.17	67.54	4	21	21	50	54.7619	192.976	W-max	0.2, 0.42, -0.13	F(2,105488)=2905.07	0	0.0, 0.0, 0.0
54	J418	2	86.71, 88.21	4.88, 7.38	38.79, 18.79	43.04, 62.04	5, 4	29, 21	29, 22	58.5, 110.625	80.25862068965517, 53.69047619047619	89.05172413793103, 169.20454545454547	W-max	-0.21, 0.4, -0.19	F(2,204065)=8359.58	0	0.05, 0.0, 0.0
55	J418	1	88.21	7.38	18.79	62.04	4	21	22	110.625	53.6905	169.205	N-max	-0.21, -0.12, 0.05	F(2,103263)=489.3	0	0.0, 0.0, 0.0
56	J418	2	86.71, 88.21	4.88, 7.38	38.79, 18.79	43.04, 62.04	5, 4	29, 21	29, 22	58.5, 110.625	80.25862068965517, 53.69047619047619	89.05172413793103, 169.20454545454547	W-max	-0.12, 0.46, -0.23	F(2,204065)=11313.8	0	0.0, 0.0, 0.0
57	J418	1	86.71	4.88	38.79	43.04	5	29	29	58.5	80.2586	89.0517	W-max	-0.25, 0.2, -0.16	F(2,100799)=1734.72	0	0.0, 0.0, 0.0
58	J418	1	86.71	4.88	38.79	43.04	5	29	29	58.5	80.2586	89.0517	R>W>N	2.27, -0.11, -0.16	F(2,100799)=21775.2	0	0.0, 0.0, 0.0
59	J418	2	86.71, 88.21	4.88, 7.38	38.79, 18.79	43.04, 62.04	5, 4	29, 21	29, 22	58.5, 110.625	80.25862068965517, 53.69047619047619	89.05172413793103, 169.20454545454547	W-max	-0.14, 0.12, -0.05	F(2,204065)=788.12	0	0.0, 0.0, 0.0
60	J418	1	86.71	4.88	38.79	43.04	5	29	29	58.5	80.2586	89.0517	X	0.0, -0.01, 0.0	F(2,100799)=1.39	0.25	1.0, 0.23, 0.77
61	J418	2	86.71, 88.21	4.88, 7.38	38.79, 18.79	43.04, 62.04	5, 4	29, 21	29, 22	58.5, 110.625	80.25862068965517, 53.69047619047619	89.05172413793103, 169.20454545454547	W-max	0.11, 0.37, -0.22	F(2,204065)=8260.74	0	0.0, 0.0, 0.0
62	J418	1	88.21	7.38	18.79	62.04	4	21	22	110.625	53.6905	169.205	R>N>W	0.9, -0.27, -0.02	F(2,103263)=4689.39	0	0.0, 0.0, 0.0
63	J418	2	86.71, 88.21	4.88, 7.38	38.79, 18.79	43.04, 62.04	5, 4	29, 21	29, 22	58.5, 110.625	80.25862068965517, 53.69047619047619	89.05172413793103, 169.20454545454547	W-max	-0.27, 0.26, -0.11	F(2,204065)=3617.11	0	0.0, 0.0, 0.0
64	J418	2	86.71, 88.21	4.88, 7.38	38.79, 18.79	43.04, 62.04	5, 4	29, 21	29, 22	58.5, 110.625	80.25862068965517, 53.69047619047619	89.05172413793103, 169.20454545454547	R>W>N	0.21, 0.08, -0.07	F(2,204065)=840.86	0	0.0, 0.0, 0.0
65	J418	1	86.71	4.88	38.79	43.04	5	29	29	58.5	80.2586	89.0517	W-max	-0.51, 0.24, -0.17	F(2,100799)=3020.8	0	0.0, 0.0, 0.0
66	J431	1	88.38	3.62	29.83	54.92	7	29	29	31.0714	61.7241	113.621	R>W>N	0.41, 0.08, -0.08	F(2,102653)=651.73	0	0.0, 0.0, 0.0
67	J431	1	88.38	3.62	29.83	54.92	7	29	29	31.0714	61.7241	113.621	N-max	-0.01, -0.51, 0.27	F(2,102653)=7625.63	0	0.0, 0.0, 0.0
68	J431	1	88.38	3.62	29.83	54.92	7	29	29	31.0714	61.7241	113.621	R>N>W	1.19, -0.22, 0.03	F(2,102653)=4115.52	0	0.0, 0.0, 0.0
69	J431	1	88.38	3.62	29.83	54.92	7	29	29	31.0714	61.7241	113.621	R>N>W	1.41, -0.43, 0.13	F(2,102653)=9320.26	0	0.0, 0.0, 0.0
70	J431	1	88.38	3.62	29.83	54.92	7	29	29	31.0714	61.7241	113.621	R>N>W	1.39, -0.32, 0.07	F(2,102653)=6724.46	0	0.0, 0.0, 0.0
71	J431	1	88.38	3.62	29.83	54.92	7	29	29	31.0714	61.7241	113.621	R>N>W	0.41, -0.25, 0.1	F(2,102653)=1809.18	0	0.0, 0.0, 0.0
72	J431	1	88.38	3.62	29.83	54.92	7	29	29	31.0714	61.7241	113.621	W-max	-0.15, 0.27, -0.14	F(2,102653)=1976.55	0	0.49, 0.0, 0.0
73	J431	1	88.38	3.62	29.83	54.92	7	29	29	31.0714	61.7241	113.621	R>W>N	0.68, 0.03, -0.07	F(2,102653)=1102.45	0	0.0, 0.0, 0.0
74	J431	1	88.38	3.62	29.83	54.92	7	29	29	31.0714	61.7241	113.621	R>N>W	1.12, -0.19, 0.02	F(2,102653)=3403.81	0	0.0, 0.0, 0.0
75	J431	1	88.38	3.62	29.83	54.92	7	29	29	31.0714	61.7241	113.621	R>N>W	0.88, -0.29, 0.1	F(2,102653)=3594.3	0	0.0, 0.0, 0.0
76	J431	1	88.38	3.62	29.83	54.92	7	29	29	31.0714	61.7241	113.621	R>N>W	2.81, -0.29, -0.03	F(2,102653)=26319.88	0	0.0, 0.0, 0.0
77	J431	1	88.38	3.62	29.83	54.92	7	29	29	31.0714	61.7241	113.621	W-max	-0.35, 0.23, -0.11	F(2,102653)=1603.48	0	0.0, 0.0, 0.0
78	J431	1	88.38	3.62	29.83	54.92	7	29	29	31.0714	61.7241	113.621	R>N>W	0.59, -0.42, 0.18	F(2,102653)=5123.82	0	0.0, 0.0, 0.0
79	J431	1	88.38	3.62	29.83	54.92	7	29	29	31.0714	61.7241	113.621	N-max	-0.02, -0.04, 0.02	F(2,102653)=37.37	0	0.03, 0.0, 0.59
80	J431	1	88.38	3.62	29.83	54.92	7	29	29	31.0714	61.7241	113.621	R>W>N	0.53, 0.1, -0.11	F(2,102653)=1202.24	0	0.0, 0.0, 0.0
81	J431	1	88.38	3.62	29.83	54.92	7	29	29	31.0714	61.7241	113.621	R>N>W	1.34, -0.26, 0.05	F(2,102653)=5494.44	0	0.0, 0.0, 0.0
82	J431	1	88.38	3.62	29.83	54.92	7	29	29	31.0714	61.7241	113.621	R>N>W	0.81, -0.41, 0.16	F(2,102653)=5542.57	0	0.0, 0.0, 0.0
83	J431	1	88.38	3.62	29.83	54.92	7	29	29	31.0714	61.7241	113.621	R>W>N	1.67, 0.28, -0.26	F(2,102653)=10864.71	0	0.0, 0.0, 0.0
84	J431	1	88.38	3.62	29.83	54.92	7	29	29	31.0714	61.7241	113.621	X	2.12, -0.1, -0.1	F(2,102653)=12674.13	0	0.0, 0.77, 0.0
85	J431	1	88.38	3.62	29.83	54.92	7	29	29	31.0714	61.7241	113.621	R>N>W	0.89, -0.17, 0.03	F(2,102653)=2217.46	0	0.0, 0.0, 0.0
86	J431	1	88.38	3.62	29.83	54.92	7	29	29	31.0714	61.7241	113.621	R>N>W	2.18, -0.31, 0.0	F(2,102653)=15702.53	0	0.0, 0.0, 0.0
87	J432	1	88.38	7.38	21.79	59.21	7	25	26	63.2143	52.3	136.635	W-max	0.14, 0.47, -0.2	F(2,102897)=4766.47	0	0.0, 0.0, 0.0
88	J432	1	88.38	7.38	21.79	59.21	7	25	26	63.2143	52.3	136.635	R>N>W	0.16, -0.16, 0.04	F(2,102897)=489.24	0	0.0, 0.0, 0.0
89	J432	1	88.38	7.38	21.79	59.21	7	25	26	63.2143	52.3	136.635	R>W>N	1.24, 0.08, -0.19	F(2,102897)=9752.2	0	0.0, 0.0, 0.0
90	J432	1	88.38	7.38	21.79	59.21	7	25	26	63.2143	52.3	136.635	R>W>N	0.16, 0.07, -0.04	F(2,102897)=238.21	0	0.0, 0.0, 0.0
91	J432	1	88.38	7.38	21.79	59.21	7	25	26	63.2143	52.3	136.635	R>N>W	1.32, -0.25, -0.07	F(2,102897)=9775.71	0	0.0, 0.0, 0.0
92	J432	1	88.38	7.38	21.79	59.21	7	25	26	63.2143	52.3	136.635	R>W>N	0.54, 0.33, -0.2	F(2,102897)=4450.33	0	0.0, 0.0, 0.0
93	J432	1	88.38	7.38	21.79	59.21	7	25	26	63.2143	52.3	136.635	W-max	0.14, 0.42, -0.17	F(2,102897)=3557.65	0	0.0, 0.0, 0.0
94	J432	1	88.38	7.38	21.79	59.21	7	25	26	63.2143	52.3	136.635	R>W>N	1.01, -0.01, -0.12	F(2,102897)=5263.57	0	0.0, 0.0, 0.0
95	J432	1	88.38	7.38	21.79	59.21	7	25	26	63.2143	52.3	136.635	R>W>N	1.05, 0.06, -0.15	F(2,102897)=6052.24	0	0.0, 0.0, 0.0
96	J432	1	88.38	7.38	21.79	59.21	7	25	26	63.2143	52.3	136.635	W-max	-0.36, 0.39, -0.11	F(2,102897)=3294.86	0	0.0, 0.0, 0.0
97	J432	1	88.38	7.38	21.79	59.21	7	25	26	63.2143	52.3	136.635	R>W>N	1.06, -0.02, -0.13	F(2,102897)=5906.68	0	0.0, 0.0, 0.0
98	J432	1	88.38	7.38	21.79	59.21	7	25	26	63.2143	52.3	136.635	W-max	0.14, 0.37, -0.16	F(2,102897)=2816.66	0	0.0, 0.0, 0.0
99	J432	1	88.38	7.38	21.79	59.21	7	25	26	63.2143	52.3	136.635	R>W>N	0.47, -0.03, -0.05	F(2,102897)=1045.78	0	0.0, 0.0, 0.0
100	J432	1	88.38	7.38	21.79	59.21	7	25	26	63.2143	52.3	136.635	R>N>W	1.11, -0.14, -0.1	F(2,102897)=6875.98	0	0.0, 0.0, 0.0
101	J432	1	88.38	7.38	21.79	59.21	7	25	26	63.2143	52.3	136.635	R>W>N	0.81, -0.02, -0.09	F(2,102897)=3230.34	0	0.0, 0.0, 0.0
102	J432	1	88.38	7.38	21.79	59.21	7	25	26	63.2143	52.3	136.635	W-max	0.06, 0.41, -0.16	F(2,102897)=3179.86	0	0.0, 0.0, 0.0
103	J434	1	90.04	7.62	14.21	68.21	6	25	25	76.25	34.1	163.7	R>W>N	0.8, 0.29, -0.16	F(2,105047)=4944.04	0	0.0, 0.0, 0.0
104	J434	1	90.04	7.62	14.21	68.21	6	25	25	76.25	34.1	163.7	R>N>W	0.37, -0.15, -0.01	F(2,105047)=795.84	0	0.0, 0.0, 0.0
105	J434	1	90.04	7.62	14.21	68.21	6	25	25	76.25	34.1	163.7	R>W>N	1.01, -0.07, -0.11	F(2,105047)=5795.53	0	0.0, 0.0, 0.0
106	J434	1	90.04	7.62	14.21	68.21	6	25	25	76.25	34.1	163.7	W-max	0.16, 0.93, -0.2	F(2,105047)=10354.59	0	0.0, 0.0, 0.0
107	J434	1	90.04	7.62	14.21	68.21	6	25	25	76.25	34.1	163.7	N-max	-0.09, -0.53, 0.12	F(2,105047)=2906.19	0	0.0, 0.0, 0.0
108	J434	1	90.04	7.62	14.21	68.21	6	25	25	76.25	34.1	163.7	R>W>N	0.33, 0.23, -0.09	F(2,105047)=1265.43	0	0.0, 0.0, 0.0
109	J434	1	90.04	7.62	14.21	68.21	6	25	25	76.25	34.1	163.7	R>N>W	0.65, -0.34, -0.01	F(2,105047)=2943.42	0	0.0, 0.0, 0.0
110	J434	1	90.04	7.62	14.21	68.21	6	25	25	76.25	34.1	163.7	R>W>N	1.22, 0.19, -0.18	F(2,105047)=9457.93	0	0.0, 0.0, 0.0
111	J434	1	90.04	7.62	14.21	68.21	6	25	25	76.25	34.1	163.7	X	0.81, 0.78, -0.25	F(2,105047)=13415.24	0	0.0, 0.0, 0.07
112	J434	1	90.04	7.62	14.21	68.21	6	25	25	76.25	34.1	163.7	W-max	-0.14, 0.75, -0.14	F(2,105047)=6161.36	0	0.99, 0.0, 0.0
113	J434	1	90.04	7.62	14.21	68.21	6	25	25	76.25	34.1	163.7	R>N>W	0.08, -0.25, 0.04	F(2,105047)=578.04	0	0.0, 0.0, 0.0
114	J434	1	90.04	7.62	14.21	68.21	6	25	25	76.25	34.1	163.7	W-max	-0.27, 0.06, 0.02	F(2,105047)=354.95	0	0.0, 0.0, 0.0
115	J435	1	90.04	7.12	14.46	68.46	5	29	30	85.5	29.9138	136.917	R>W>N	0.24, 0.09, -0.04	F(2,104597)=377.54	0	0.0, 0.0, 0.0
116	J435	1	90.04	7.12	14.46	68.46	5	29	30	85.5	29.9138	136.917	N-max	-0.17, -0.05, 0.03	F(2,104597)=189.14	0	0.0, 0.0, 0.0
117	J435	1	90.04	7.12	14.46	68.46	5	29	30	85.5	29.9138	136.917	X	0.15, -0.01, -0.02	F(2,104597)=107.64	0	0.0, 0.7, 0.0
118	J435	1	90.04	7.12	14.46	68.46	5	29	30	85.5	29.9138	136.917	W-max	0.0, 1.24, -0.26	F(2,104597)=21802.78	0	0.0, 0.0, 0.0
119	J435	1	90.04	7.12	14.46	68.46	5	29	30	85.5	29.9138	136.917	R>W>N	0.62, 0.52, -0.17	F(2,104597)=5465.41	0	0.0, 0.0, 0.0
120	J435	1	90.04	7.12	14.46	68.46	5	29	30	85.5	29.9138	136.917	X	0.1, 0.11, -0.03	F(2,104597)=174.76	0	0.0, 0.0, 0.48
121	J435	1	90.04	7.12	14.46	68.46	5	29	30	85.5	29.9138	136.917	R>N>W	0.45, -0.29, 0.01	F(2,104597)=1585.77	0	0.0, 0.0, 0.0
122	J435	1	90.04	7.12	14.46	68.46	5	29	30	85.5	29.9138	136.917	R>W>N	0.81, 0.46, -0.2	F(2,104597)=7319.53	0	0.0, 0.0, 0.0
123	J435	1	90.04	7.12	14.46	68.46	5	29	30	85.5	29.9138	136.917	X	0.69, -0.06, -0.06	F(2,104597)=2250.64	0	0.0, 0.86, 0.0
124	J435	1	90.04	7.12	14.46	68.46	5	29	30	85.5	29.9138	136.917	W-max	0.13, 0.34, -0.1	F(2,104597)=1546.98	0	0.0, 0.0, 0.0
125	J435	1	90.04	7.12	14.46	68.46	5	29	30	85.5	29.9138	136.917	W-max	0.12, 0.46, -0.1	F(2,104597)=2243.95	0	0.0, 0.0, 0.0
126	J435	1	90.04	7.12	14.46	68.46	5	29	30	85.5	29.9138	136.917	X	1.16, -0.11, -0.1	F(2,104597)=6771.46	0	0.0, 0.53, 0.0
127	J435	1	90.04	7.12	14.46	68.46	5	29	30	85.5	29.9138	136.917	R>W>N	1.06, -0.05, -0.1	F(2,104597)=5482.29	0	0.0, 0.0, 0.0
128	J435	1	90.04	7.12	14.46	68.46	5	29	30	85.5	29.9138	136.917	R>W>N	0.86, 0.37, -0.17	F(2,104597)=5815.2	0	0.0, 0.0, 0.0
129	J435	1	90.04	7.12	14.46	68.46	5	29	30	85.5	29.9138	136.917	R>W>N	0.74, 0.0, -0.08	F(2,104597)=2741.12	0	0.0, 0.0, 0.0
130	J435	1	90.04	7.12	14.46	68.46	5	29	30	85.5	29.9138	136.917	R>N>W	0.37, -0.08, -0.02	F(2,104597)=629.66	0	0.0, 0.0, 0.0
131	J435	1	90.04	7.12	14.46	68.46	5	29	30	85.5	29.9138	136.917	W-max	0.23, 0.64, -0.16	F(2,104597)=5108.74	0	0.0, 0.0, 0.0
132	J435	1	90.04	7.12	14.46	68.46	5	29	30	85.5	29.9138	136.917	W-max	-0.18, 0.67, -0.12	F(2,104597)=4713.11	0	0.0, 0.0, 0.0
133	J435	1	90.04	7.12	14.46	68.46	5	29	30	85.5	29.9138	136.917	R>W>N	1.11, 0.15, -0.14	F(2,104597)=6837.77	0	0.0, 0.0, 0.0
134	J435	1	90.04	7.12	14.46	68.46	5	29	30	85.5	29.9138	136.917	W-max	0.59, 0.72, -0.22	F(2,104597)=9056.14	0	0.0, 0.0, 0.0
135	J435	1	90.04	7.12	14.46	68.46	5	29	30	85.5	29.9138	136.917	W-max	0.03, 0.94, -0.2	F(2,104597)=10939.09	0	0.0, 0.0, 0.0
136	J435	1	90.04	7.12	14.46	68.46	5	29	30	85.5	29.9138	136.917	R>W>N	0.77, 0.69, -0.22	F(2,104597)=9742.56	0	0.0, 0.0, 0.0
