# Supplementary material for: Prefrontal Cortical Regulation of REM Sleep
Source: Research Square preprint supplement (doi:10.21203/rs.3.rs-1417511/v1), 2023-10-10
Supplement: Supplementary file 3 [file ff6066045855033952826876.docx]

Inventory of Supporting Information

**Manuscript #:** NN-A78483C

| Please complete each of the Inventory Tables below to outline your Extended Data and Supplementary Information items.  There are four sections:   - *Extended Data* - *Supplementary Information: PDF Files* - *Supplementary Information: Additional Files* - *Source Data*   Each section includes specific instructions. Please complete these tables as fully as possible. We ask that you avoid using spaces in your file names, and instead use underscores, i.e.: Smith_ED_Fig1.jpg not Smith ED Fig1.jpg  Please note that titles and descriptive captions will only be lightly edited, so please ensure that you are satisfied with these prior to submission.  If you have any questions about any of the information contained in this inventory, please contact the journal. |
| --- |
|  |

**Corresponding author name(s):** Dr. Franz Weber

1. **Extended Data**

**Complete the Inventory below for all Extended Data Figures and Tables**

- Keep Figure/Table titles to one sentence only
- Upload your files as ‘Figure Files’ in our Manuscript Tracking system
- File names should include the Figure/Table Number. i.e.: *Smith_ED_Fig1.jpg*
- Please be sure to include the file extension in the Filename. Note that Extended Data files (including tables) must be submitted as .jpg, .tif or .eps files *only*, and should be no more than 10MB
- All Extended Data item legends must be provided in the Inventory below and should not exceed 300 words each *(if possible)*
- Please include Extended Data *ONLY* in this table

| Figure or Table #  Please group Extended Data items by type, in sequential order. Total number of items (Figs. + Tables) must not exceed 10. | Figure/Table title  One sentence only | Filename  Whole original file name including extension. i.e.: Smith_ED_Fig1.jpg | Figure/Table Legend  If you are citing a reference for the first time in these legends, please include all new references in the main text Methods References section, and carry on the numbering from the main References section of the paper. If your paper does not have a Methods section, include all new references at the end of the main Reference list. |
| --- | --- | --- | --- |
| Extended Data Fig. 1 | Population activity of mPFC pyramidal neurons during sleep. | Extended_Data_Fig_01.tif | (a) Left, schematic of calcium imaging of mPFC pyramidal (Pyr) neurons using fiber photometry. AAV-CaMKII-Cre and AAV-FLEX-GCaMP6s were injected into the mPFC. Right, fluorescence image showing expression of GCaMP6s (green) in the mPFC. Scale bar, 500 μm. Brain atlas images adapted with permission from ref. 61.  (b) Position of optic fibers within the mPFC used for imaging of mPFC Pyr neurons. Each diagram depicts the section where the lesion caused by the optic fiber (colored bar) was largest along the rostrocaudal axis (n = 7 mice). PL, prelimbic cortex; IL, infralimbic cortex.  (c) Example fiber photometry recording. Shown are EEG spectrogram, EMG amplitude, brain states, and ΔF/F signal. PSD, power spectral density.  (d) Average ΔF/F activity during REM, wake, and NREM sleep. One-way repeated-measures (rm) ANOVA, P = 0.0000; t-tests with Holm-Bonferroni correction; REM vs Wake, P = 0.0001; Wake vs NREM, P = 0.0003; REM vs NREM, P = 0.0000. n = 7 mice. Bars, averages across mice; lines, individual mice; error bars, 95% confidence intervals (CIs).  (e) Average EEG spectrogram (normalized by the mean power in each frequency band) and mean calcium activity (ΔF/F, z-scored) at brain state transitions. Horizontal lines indicate the time points for which the ΔF/F activity significantly differed from baseline (-60 to -50 s; **Methods**). One-way rm ANOVA with 10 s time bins as within factor; P = 0.0000; paired t-tests with Holm-Bonferroni correction; P < 0.05, n = 7 mice. Black lines, averages across mice; gray lines, individual mice.  See **Supplementary Table 1** for detailed statistical information. ***P<0.001. |
| Extended Data Fig. 2 | Expression of ChR2-eYFP throughout mPFC and effects of laser stimulation in mice expressing ChR2-eYFP or eYFP. | Extended_Data_Fig_02.tif | (a) Left, expression of ChR2-eYFP in the mPFC. For each mouse (n = 11), we determined the spread of ChR2-eYFP in four consecutive brain sections along the rostrocaudal axis. The color code indicates in how many mice the virus expression overlapped at the corresponding location. Right, each colored bar represents the location of an optic fiber used for optogenetic stimulation of mPFC Pyr neurons. Brain atlas images adapted with permission from ref. 61.  (b) Open-loop stimulation in control mice expressing eYFP in mPFC Pyr neurons. All laser stimulation trials from n = 8 mice were aligned with the laser onset (t = 0 s). Trials were sorted depending on the brain state at laser onset (arrows).  (c) Effect of laser stimulation in eYFP control mice on brain states. Two-way rm ANOVA comparing the mean percentage of each brain state between the laser and preceding 120 s baseline interval (interaction, P = 0.4675). n = 8 mice. Lines, averages across mice; shadings, 95% CIs.  (d) Cumulative transition probabilities for ChR2 mice to remain in REM sleep (R→R), wake (W→W), or NREM sleep (N→N) during the laser and preceding 120 s baseline interval. Bootstrap; R→R, P = 0.0001; W→W, P = 0.0042; N→N, P = 0.0001; n = 11 mice. Shadings, 95% CIs.  (e) Differences of laser-induced changes in the cumulative transition probabilities between ChR2 (n = 11) and eYFP mice (n = 8). Each violin plot represents the sampling distribution of the mean difference in the laser-induced changes between ChR2 and eYFP mice (**Methods**). Bootstrap; N→R, P = 0.0001; R→W, P = 0.0012; N→W, P = 0.3610; W→N, P = 0.3684; R→R, P = 0.0012; W→W, P = 0.3684; N→N, P = 0.0001. Blue lines, 95% CIs; white dots, distribution means.  (f) Top, PSD of the EEG during REM sleep with (ON) and without laser stimulation (OFF) for open-loop activation of mPFC Pyr neurons in ChR2 mice. The colored patches indicate the frequency ranges for the δ (0.5 - 4.5 Hz), θ (6.0 - 9.5 Hz), and σ power (10 - 15 Hz). For each frequency band, we tested whether the power significantly differs between REM sleep with and without laser. Two-way rm ANOVA with laser (ON or OFF, P = 0.0001) and frequency band as within factors (interaction, P=0.0000); t-tests with Holm-Bonferroni correction; OFF vs ON: δ, P = 0.0813; θ, P = 0.0000; σ, P = 0.0000. n = 11 ChR2 mice. Shadings, 95% CIs. Bottom, laser-induced changes in the δ, θ, and σ power (Δ power) between REM sleep with and without laser stimulation in eYFP and ChR2 mice. Mixed ANOVA with frequency band as within factor and virus (eYFP or ChR2) as between factor (interaction, P=0.0000); t-tests with Holm-Bonferroni correction; eYFP vs ChR2: δ, P = 0.0068; θ, P=0.0001; σ, P=0.0001. ChR2, n = 11; eYFP, n = 8 mice. Bars, averages across mice; dots, individual mice; error bars, 95% CIs.  (g) Top, PSD during wake with and without laser stimulation. Two-way rm ANOVA (laser, P = 0.0147; interaction, P = 0.0007); t-tests with Holm-Bonferroni correction; OFF vs ON: δ, P = 0.0046; θ, P = 0.0106; σ, P = 0.0106. n = 11 ChR2 mice. Shadings, 95% CIs. Bottom, laser-induced power changes between wake with and without laser stimulation in eYFP and ChR2 mice. Mixed ANOVA (interaction, P=0.0000); t-tests with Holm-Bonferroni correction; eYFP vs ChR2: δ, P = 0.0162; θ, P = 0.0911; σ, P = 0.0911. ChR2, n = 11; eYFP, n = 8 mice. Bars, averages across mice; dots, individual mice; error bars, 95% CIs.  (h) Top, PSD during NREM sleep with and without laser stimulation. Two-way rm ANOVA; (laser, P = 0.0129; interaction, P = 0.0017); t-tests with Holm-Bonferroni correction; OFF vs ON: δ, P = 0.0020; θ, P = 0.3486; σ, P = 0.0348. n = 11 ChR2 mice. Shadings, 95% CIs. Bottom, laser-induced power changes between NREM sleep with and without laser stimulation in eYFP and ChR2 mice. Mixed ANOVA (interaction, P = 0.0021); t-tests with Holm-Bonferroni correction; eYFP vs ChR2: δ, P = 0.0078; θ, P = 0.4394; σ, P = 0.2171. ChR2, n = 11; eYFP, n = 8 mice. Bars, averages across mice; dots, individual mice; error bars, 95% CIs.  (i) Top, EMG amplitude during each brain state with and without laser stimulation. Two-way rm ANOVA (laser, P = 0.0290; interaction, P = 0.0421); t-tests with Holm-Bonferroni correction; OFF vs ON: REM, P = 0.3573; Wake, P = 0.1089; NREM, P = 0.5518. n = 11 ChR2 mice. Box plots (see **Methods** for definition); lines, individual mice. Bottom, laser-induced changes in the EMG amplitude during each brain state with and without laser stimulation. Mixed ANOVA (interaction, P = 0.0529). ChR2, n = 11; eYFP, n = 8 mice. Bars, averages across mice; dots, individual mice; error bars, 95% CIs.  See **Supplementary Table 1** for detailed statistical information. *P<0.05, **P<0.01, ***P<0.001. |
| Extended Data Fig. 3 | Effects of closed-loop activation and inhibition of mPFC Pyr neurons on EEG and REM sleep duration. | Extended_Data_Fig_03.tif | (a) PSD of the EEG during REM sleep with (ON) and without laser stimulation (OFF) of mPFC Pyr neurons expressing ChR2. Two-way rm ANOVA with laser (P = 0.0057) and frequency band (δ, θ, or σ) as within factors (interaction, P = 0.0001); t-tests with Holm-Bonferroni correction; OFF vs ON: δ, P = 0.0094; θ, P = 0.0011; σ, P = 0.0005. n = 11 mice. Shadings, 95% CIs.  (b) Laser-induced changes in the δ, θ, and σ power (Δ power) between REM sleep with and without laser stimulation in eYFP and ChR2 mice. Mixed ANOVA with frequency band as within and virus (eYFP or ChR2) as between factor (interaction, P = 0.0000); t-tests with Holm-Bonferroni correction; eYFP vs ChR2: δ, P = 0.0041; θ, P = 0.0012; σ, P = 0.0330. ChR2, n = 11; eYFP, n = 8 mice. Bars, averages across mice; dots, individual mice; error bars, 95% CIs.  (c) Duration of REM sleep episodes with (ON) or without laser (OFF) and REM sleep duration in baseline recordings without laser stimulation (Bsl) in ChR2 mice. One-way rm ANOVA (laser, P = 0.0001); t-tests with Holm Bonferroni correction; Bsl vs OFF: P = 0.0253; Bsl vs ON: P = 0.0054; OFF vs ON: P = 0.0054. n = 6 mice. Box plots; lines, individual mice.  (d) Left, heatmaps depicting expression of iC++-eYFP in the mPFC in four consecutive brain sections (n = 8 mice). Right, location of fiber tracts. Each pair of colored bars represents the location of two optic fibers for bilateral inhibition. Brain atlas images adapted with permission from ref. 61.  (e) PSD of the EEG during REM sleep with and without laser stimulation of mPFC Pyr neurons expressing iC++. Two-way rm ANOVA (laser, P = 0.0001; interaction, P = 0.0000); t-tests with Holm-Bonferroni correction; OFF vs ON: δ, P = 0.1792; θ, P = 0.0001; σ, P = 0.0281. n = 8 mice. Shadings, 95% CIs.  (f) Laser-induced changes in the δ, θ, and σ power (Δ power) between REM sleep with and without laser stimulation in eYFP and iC++ mice. Mixed ANOVA (interaction, P = 0.0000); t-tests with Holm-Bonferroni correction; eYFP vs iC++: δ, P = 0.8948; θ, P = 0.0000; σ, P = 0.0029. iC++, n = 8; eYFP, n = 8 mice. Bars, averages across mice; dots, individual mice; error bars, 95% CIs.  (g) Duration of laser-on or laser-off REM sleep episodes and REM sleep duration in baseline recordings without laser stimulation in iC++ mice. One-way rm ANOVA (laser, P = 0.0000); t-tests with Holm-Bonferroni correction; Bsl vs OFF: P = 0.0120; Bsl vs ON: P = 0.0120; OFF vs ON: P = 0.0003. n = 8 mice. Box plots; lines, individual mice.  (h) PSD of the EEG during phasic θ events and remaining REM sleep (tonic θ) with (ON) and without laser (OFF) in iC++ mice. Peak frequency, Two-way rm ANOVA with type of REM (tonic or phasic, P = 0.0000) and laser (ON or OFF) as within factors (interaction, 0.2849); t-tests with Holm-Bonferroni correction, tonic vs phasic: OFF, P = 0.0000; ON, P = 0.0000. EEG θ power, Two-way rm ANOVA (type, P = 0.0001; interaction, P = 0.0953); t-tests with Holm-Bonferroni correction; tonic vs phasic: OFF, P = 0.0003; ON, P = 0.0003. n = 8 mice. Lines, averages across mice; shadings, 95% CIs.  (i) Heart rate during phasic θ events and remaining REM sleep (tonic θ) with (ON) and without laser (OFF) in iC++ mice. Two-way rm ANOVA (type, P = 0.0001; interaction, P = 0.4153); t-tests with Holm-Bonferroni correction, tonic vs phasic: OFF, P = 0.0182; ON, P = 0.0123; n = 5 mice. Box plots; lines, individual mice; bpm, beats per minute.  (j) Frequency of phasic θ events as function of time in REM sleep (since REM sleep onset) in baseline recordings from ChR2 and iC++ mice without laser stimulation. For each mouse, we averaged the frequency of phasic θ events across all REM sleep episodes for each 25 s time bin on the x-axis. Each dot corresponds to the mean frequency of one animal. Robust regression; P = 0.0000; n = 14 mice. The line and shading indicate the robust regression fit and 95% CI.  (k) Mean duration of all REM sleep episodes (averaged across laser-on and laser-off episodes) in closed-loop experiments for ChR2, iC++ mice, and eYFP controls for activation (eYFP1) and inhibition experiments (eYFP2). One-way ANOVA (P = 0.8359); eYFP1, n = 8; ChR2, n = 11; eYFP2, n = 8; iC++, n = 8 mice. Bars, averages across mice; dots, individual mice; error bars, 95% CIs.  See **Supplementary Table 1** for detailed statistical information. *P<0.05, **P<0.01, ***P<0.001. |
| Extended Data Fig. 4 | mPFC Pyr neuron activity promotes rapid EMs during REM sleep. | Extended_Data_Fig_04.tif | (a) Schematic illustrating pupil recordings using an infrared (IR) camera in head-fixed animals.  (b) Example of REM sleep with phasic θ events in the EEG and rapid EMs. Two phasic θ events are shown in red in the raw EEG (top) and indicated by dashed lines in the EEG spectrogram (middle). Rapid EMs (blue ticks) are identified as sudden accelerations in the pupil speed (bottom). Inset, consecutive movie frames including a rapid EM. Red circles, automatically detected pupil position; blue circles, pupil position in previous video frame; scale bars; 200 µV, 1 s; px/s, pixels per second.  (c) Inter-EM distribution calculated for all REM sleep periods in recordings without laser stimulation (n = 12 mice). Red line, threshold for defining EM bursts (250 ms).  (d) Frequency of all EMs and EM bursts during phasic θ events and randomly selected epochs of equal duration within REM sleep in baseline recordings without laser stimulation. All EMs, paired t-test, P = 0.0000; EM bursts, paired t-test, P = 0.0000. n = 12 mice. Box plots; dots, individual mice.  (e) Duration of REM sleep episodes with (ON) or without (OFF) laser activation of ChR2-expressing mPFC Pyr neurons and REM sleep duration in baseline recordings without laser stimulation (Bsl) in the same animals. One-way rm ANOVA with laser as within factor (P = 0.0000); t-tests with Holm-Bonferroni correction; Bsl vs OFF: P = 0.2029; Bsl vs ON: P = 0.0016; OFF vs ON: P = 0.0005. n = 6 mice. Box plots; lines, individual mice.  (f) Frequency of phasic θ events during laser-on and laser-off REM sleep episodes and episodes in baseline recordings without laser in ChR2 mice. One-way rm ANOVA (P = 0.0012); t-tests with Holm-Bonferroni correction; Bsl vs OFF: P = 0.1183; Bsl vs ON: P = 0.0427; OFF vs ON: P = 0.0173. n = 6 mice. Box plots; lines, individual mice.  (g) Frequency of EMs and EM bursts during laser-on, laser-off and baseline REM sleep episodes in ChR2 mice. Note that REM sleep episodes with duration < 20 s were excluded from this analysis (**Methods**). All EMs, one-way rm ANOVA (P = 0.0140); t-tests with Holm-Bonferroni correction; Bsl vs OFF: P = 0.0483; Bsl vs ON: P = 0.0483; OFF vs ON: P = 0.0483. EM bursts, one-way rm ANOVA (P = 0.0030); t-tests; Bsl vs OFF: P = 0.0493; Bsl vs ON: P = 0.0493; OFF vs ON: P = 0.0493. n = 6 mice. Box plots; lines, individual mice.  (h) Latency between the onset of REM sleep and the first EM for laser-on and laser-off episodes and episodes in baseline recordings without laser in ChR2 mice. One-way rm ANOVA with laser as within factor (P = 0.0682). n = 6 mice. Bars, averages across mice; dots, individual mice; error bars, 95% CIs.  (i) Duration of laser-off or laser-on REM sleep episodes and baseline duration in recordings without laser in mice expressing iC++ in mPFC Pyr neurons. One-way rm ANOVA (P = 0.0051); t-tests with Holm-Bonferroni correction; Bsl vs OFF: P = 0.1219; Bsl vs ON: P = 0.0395; OFF vs ON: P = 0.0198. n = 6 mice. Box plots; lines, individual mice.  (j) Frequency of phasic θ events during laser-on, laser-off, and baseline REM sleep episodes in iC++ mice. One-way rm ANOVA (P = 0.0031); t-tests with Holm-Bonferroni correction; Bsl vs OFF: P = 0.6853; Bsl vs ON: P = 0.0272; OFF vs ON, P = 0.0495. n = 6 mice. Box plots; lines, individual mice.  (k) Frequency of EMs and EM bursts during laser-on, laser-off, and baseline REM sleep episodes in iC++ mice. Note that REM sleep episodes with duration < 20 s were excluded from this analysis. All EMs, one-way rm ANOVA (P = 0.0000); t-tests with Holm-Bonferroni correction; Bsl vs OFF: P = 0.0356; Bsl vs ON: P = 0.0042; OFF vs ON: P = 0.0005. EM bursts, one-way rm ANOVA (P = 0.0000); t-tests with Holm-Bonferroni correction; Bsl vs OFF: P = 0.0353; Bsl vs ON: P = 0.0048; OFF vs ON:P = 0.0003. n = 6 mice. Box plots; lines, individual mice.  (l) Latency between the onset of REM sleep and the first EM for laser-on, laser-off, and baseline episodes in iC++ mice. One-way rm ANOVA (P = 0.8167). n = 6 mice. Bars, averages across mice; dots, individual mice; error bars, 95% CIs.  (m) Effect of mPFC Pyr neuron activation on the frequency of all EMs and EM bursts for different durations of baseline and laser-on episodes. All EMs, two-way ANOVA with laser (Bsl or ON, P = 0.0000) and REM bout duration as between factors (interaction, P = 0.0036); t-tests with Holm-Bonferroni correction; 0 - 40 s, P = 0.0023; 40 - 80 s, P = 0.0012; for 80 - 120 s, P = 0.3496; > 120 s, P = 0.9968. EM bursts, two-way ANOVA (laser, P = 0.0001; interaction, P = 0.0130); t-tests; 0 - 40 s duration, P = 0.0212; 40 - 80 s, P = 0.0197; for 80 - 120 s, P = 0.8791; for > 120 s, P = 0.8791. Bsl, n = 434; ON, n = 240 episodes. Bars, averages across mice; dots, individual mice; error bars, 95% CIs.  (n) Effect of mPFC Pyr neuron inhibition on the frequency of all EMs and EM bursts for different durations of baseline and laser-on episodes. All EMs, two-way ANOVA (laser, P = 0.0003; interaction, P = 0.0052); t-tests with Holm-Bonferroni correction; 0 - 40 s, P = 0.1656; 40 - 80 s, P = 0.0724; 80 - 120 s, P = 0.0362; > 120 s, P = 0.0088. EM bursts, two-way ANOVA (P = 0.0004; interaction, P = 0.0017); t-tests; 0 - 40 s, P = 0.2412; 40 - 80 s, P = 0.1671; 80 - 120 s, P = 0.0096; > 120 s, P = 0.0096. Bsl, n = 501; ON, n = 216 episodes. Bars, averages across mice; dots, individual mice; error bars, 95% CIs.  See **Supplementary Table 1** for detailed statistical information. *P<0.05, **P<0.01, ***P<0.001. |
| Extended Data Fig. 5 | Effects of optogenetic activation of mPFC inhibitory neurons on brain state and EEG. | Extended_Data_Fig_05.tif | (a) Placement of optic fibers in the mPFC for ChR2-mediated activation of mPFC Vgat neurons. Each colored bar represents the location of an optic fiber. Brain atlas images adapted with permission from ref. 61.  (b) Laser stimulation trials from all n = 7 control mice expressing eYFP in mPFC Vgat neurons, sorted depending on the brain state at laser onset (t = 0 s, arrows).  (c) Percentages of all brain states before, during, and after open-loop stimulation in eYFP control mice. Blue patch, laser stimulation interval (120 s, 20 Hz). Two-way rm ANOVA comparing the mean percentage of each brain state between the laser and preceding 120 s baseline interval (interaction, P = 0.1228). n = 7 mice. Lines, averages across mice; shadings, 95% CIs.  (d) Cumulative transition probabilities in ChR2 mice to remain in REM sleep (R→R), wake (W→W), or NREM sleep (N→N) during the laser and preceding 120 s baseline interval. Bootstrap, R→R, P = 0.0001; W→W, P = 0.0234; N→N, P = 0.0004. n = 8 mice. Shadings, 95% CIs.  (e) Differences of laser-induced changes in the cumulative transition probabilities between ChR2 and eYFP mice (**Methods**). Bootstrap; N→R, P < 0.0001; R→W, P = 0.0318; N→W, P = 0.6890; W→N, P = 0.0300; R→R, P = 0.0318; W→W, P = 0.0272; N→N, P = 0.0014. ChR2, n = 8; eYFP, n = 7 mice. Blue lines, 95% CIs; white dots, distribution means.  (f) PSD of the EEG during REM sleep with (ON) and without laser stimulation (OFF). Two-way rm ANOVA with laser (P = 0.0135) and frequency band (δ, θ, or σ) as within factors (interaction, P = 0.0002); t-tests with Holm-Bonferroni correction; OFF vs ON: δ, P = 0.0068; θ, P = 0.0059; σ, P = 0.0068. n = 8 mice. Lines, averages across mice; shadings, 95% CIs.  (g) Laser-induced changes in the δ, θ, and σ power (Δ power) between REM sleep with and without laser stimulation in eYFP and ChR2 mice. Mixed ANOVA with frequency band and virus as within and between factors (interaction, P = 0.0000); t-tests with Holm-Bonferroni correction; eYFP vs ChR2: δ, P = 0.0073; θ, P = 0.0022; σ, P = 0.0073. ChR2, n = 8; eYFP, n = 7 mice. Bars, averages across mice; dots, individual mice; error bars, 95% CIs.  See **Supplementary Table 1** for detailed statistical information. *P<0.05, **P<0.01, ***P<0.001. |
| Extended Data Fig. 6 | Axonal projections of mPFC Pyr neurons and molecular identity of mPFC→LH neurons. | Extended_Data_Fig_06.tif | (a) Schematic of anterograde tracing experiment. AAV-CaMKII-Cre and AAV-DIO-tdTomato were injected into the mPFC of C57BL/6J mice to label axonal projections of mPFC Pyr neurons (n = 3 mice).  (b) Injection site in the mPFC. Scale bar, 500 μm. Histology pictures in (b-g) are from the same animal.  (c) tdTomato-labeled axon fibers in the thalamus. MD, mediodorsal thalamic nucleus; VA, ventral anterior thalamic nucleus; AM, anteromedial thalamic nucleus; Re, reuniens thalamic nucleus; Rt, reticular nucleus. Scale bar, 500 μm.  (d) tdTomato-labeled axon fibers in the basolateral amygdala (BLA). Scale bar, 500 μm.  (e) Axon fibers in the lateral hypothalamus (LH). Scale bar, 500 μm.  (f) Axon fibers in the lateral and dorsolateral periaqueductal gray (LPAG and DLPAG). VLPAG, ventrolateral periaqueductal gray. Scale bar, 500 μm.  (g) Axon fibers in the dorsal pons. LDTg, laterodorsal tegmental nucleus. Scale bar, 500 μm.  (h) Top, schematic depicting injection of AAVrg-Cre into the LH of a C57BL/6J mouse. Bottom, fluorescence in situ hybridization (FISH) for Cre in the mPFC. Scale bar, 500 μm.  (i) Double FISH was performed for Cre and *Slc17A7* (gene encoding vesicular glutamate transporter 1), *Slc32a1* (gene encoding vesicular GABA transporter), or *Npr3*. Top, fluorescence images showing *Cre*, *Slc17A7* probe, and overlay of both channels. Middle, double FISH for *Cre* and *Slc32a1*. Bottom, double FISH for *Cre* and *Npr3*. Arrowheads indicate co-labeled cells. Scale bars, 25 μm.  (j) Percentages of Cre-expressing neurons in the mPFC that also express *Slc17A7*, *Slc32a1*, or *Npr3*. Dots, data from single mice (*Slc17A7*, n = 4; *Slc32a1*, n = 4; *Npr3*, n = 2 mice).  Mouse brain figures in (a,h) adapted with permission from ref. 61. |
| Extended Data Fig. 7 | Effects of optogenetic stimulation of axonal fibers of mPFC Pyr neurons in LH, LDTg, MD, and PAG. | Extended_Data_Fig_07.tif | (a) Top, schematic depicting ChR2-mediated activation of axons of mPFC Pyr neurons in the LH. Bottom, fluorescence images showing expression of ChR2-eYFP in the mPFC (left) and optic fiber tract in the LH (right). Scale bars, 500 μm.  (b) Placement of optic fibers in the LH for laser-activation of mPFC projections. Each colored bar represents the location of an optic fiber.  (c) Percentages of brain states before, during, and after laser stimulation. Blue bar, laser stimulation interval (120 s, 5 Hz). Two-way rm ANOVA comparing the mean percentage of each brain state between the laser and preceding 120 s baseline interval (interaction, P = 0.0000); t-tests with Holm-Bonferroni correction; REM, P = 0.0005; Wake, P = 0.0184; NREM, P = 0.0001. n = 8 mice. Lines, averages across mice; shadings, 95% CIs.  (d) Graph summarizing changes in the cumulative transition probabilities induced by activation of the mPFC-LH projections. Solid and dashed lines indicate significant and non-significant changes in the transition probabilities, respectively.  (e) Top, laser-trial averaged normalized EEG spectrogram (**Methods**). Bottom, time course of δ, θ, and γ power before, during, and after laser stimulation. Two-way rm ANOVA comparing the mean power of each frequency band between the laser and preceding 120 s baseline interval (interaction, P = 0.0000); t-tests with Holm-Bonferroni correction; baseline vs laser: δ, P = 0.0000; θ, P = 0.0013; γ, P = 0.0001. n = 8 mice. Lines, averages across mice; shadings, 95% CIs.  (f) Duration of REM sleep episodes with and without closed-loop stimulation of mPFC projections. Paired t-test; P = 0.0003. n = 8 mice. Box plots; lines, individual mice.  (g) Frequency of phasic θ events during REM sleep with and without closed-loop stimulation. Paired t-test; P = 0.0005. n = 8 mice. Box plots; lines, individual mice.  (h) Top, schematic depicting ChR2-mediated activation of mPFC axons in the laterodorsal tegmental nucleus (LDTg). Bottom, fluorescence images showing expression of ChR2-eYFP in the mPFC (left) and fiber tract in the LDTg (right). Scale bars, 500 μm.  (i) Placement of optic fibers in the LDTg.  (j) Percentages of brain states before, during, and after laser stimulation. Blue bar, laser stimulation interval. Two-way rm ANOVA (interaction, P = 0.1145). n = 7 mice. Lines, averages across mice; shadings, 95% CIs.  (k) Duration of REM sleep episodes with and without closed-loop stimulation. Paired t-test; P = 0.4112. n = 7 mice. Box plots; lines, individual mice.  (l) Frequency of phasic θ events during REM sleep with and without closed-loop stimulation. Paired t-test;P = 0.8095. n = 7 mice. Box plots, lines, individual mice.  (m) Top, schematic depicting ChR2-mediated activation of mPFC axons in the mediodorsal thalamic nucleus (MD). Bottom, fluorescence images showing expression of ChR2-eYFP in the mPFC (left) and fiber tract in the MD (right). Scale bars, 500 μm.  (n) Placement of optic fibers in the MD.  (o) Percentages of brain states before, during, and after laser stimulation. Blue bar, laser stimulation interval. Two-way rm ANOVA (interaction, P = 0.7918). n = 7 mice. Lines, averages across mice; shadings, 95% CIs.  (p) Duration of REM sleep episodes with and without closed-loop stimulation. Paired t-test; P = 0.8255. n = 7 mice. Box plots; lines, individual mice.  (q) Frequency of phasic θ events during REM sleep with and without closed-loop stimulation. Paired t-test; P = 0.0824. n = 7 mice. Box plots; lines, individual mice.  (r) Top, schematic depicting ChR2-mediated activation of mPFC axons in the periaqueductal gray (PAG). Bottom, fluorescence images showing expression of ChR2-eYFP in the mPFC (left) and fiber tract in the PAG (right). Scale bars, 500 µm.  (s) Placement of optic fibers in the PAG.  (t) Percentages of brain states before, during, and after laser stimulation. Blue bar, laser stimulation interval. Two-way rm ANOVA (interaction, P = 0.1030). n = 6 mice. Lines, averages across mice; shadings, 95% CIs.  (u) Duration of REM sleep episodes with and without closed-loop stimulation. Paired t-test; P = 0.4870. n = 6 mice. Box plots; lines, individual mice.  (v) Frequency of phasic θ events during REM sleep with and without closed-loop stimulation. Paired t-test; P = 0.1491. n = 6 mice. Box plots; lines, individual mice.  Brain atlas images in (a,b,h,i,m,n,r,s) adapted with permission from ref. 61. See **Supplementary Table 1** for detailed statistical information. *P<0.05, **P<0.01, ***P<0.001. |
| Extended Data Fig. 8 | Effects of laser stimulation in mice expressing ChR2-eYFP or eYFP in mPFC→LH neurons. | Extended_Data_Fig_08.tif | (a) Left, heatmaps depicting expression of ChR2-eYFP in the mPFC of mice injected with AAVrg-Cre-mCherry into the LH and AAV-DIO-ChR2-eYFP into the mPFC and location of optic fiber tracts (n = 10 mice). Right, expression of mCherry in the hypothalamus. Brain atlas images adapted with permission from ref. 61.  (b) Top, laser-trial averaged normalized EEG spectrogram in ChR2 mice. Bottom, time course of δ, θ, and γ power before, during, and after laser stimulation. Two-way rm ANOVA comparing the mean power in each frequency band between the laser and preceding 120 s baseline interval (interaction, P = 0.0001); t-tests with Holm-Bonferroni correction; baseline vs laser: δ, P = 0.0005; θ, P = 0.0005; γ, P = 0.0005. n = 10 mice. Lines, averages across mice; shadings, 95% CIs.  (c) Laser stimulation trials from all control mice (n = 9) expressing eYFP in mPFC→LH neurons, sorted depending on the brain state at laser onset (t = 0 s, arrows).  (d) Effect of open-loop stimulation on brain states before, during, and after laser stimulation in eYFP control mice. Two-way rm ANOVA comparing the mean percentage of each brain state between the laser and preceding 120 s baseline interval (interaction, P = 0.4312). n = 9 mice. Lines, averages across mice; shadings, 95% CIs.  (e) Changes in the percentage of each brain state (difference between the 120 s baseline and laser interval) induced by laser stimulation in mice expressing ChR2 and eYFP in mPFC→LH neurons. Mixed ANOVA with brain state as within and virus as between factor (interaction, P = 0.0000); t-tests with Holm-Bonferroni correction; eYFP vs ChR2: REM, P = 0.0004; wake, P = 0.2857; NREM, P = 0.0005. ChR2, n = 10 mice; eYFP, n = 9 mice. Bars, averages across mice; dots, individual mice; error bars, 95% CIs.  (f) Cumulative transition probabilities in ChR2 mice to remain in REM sleep (R→R), wake (W→W), or NREM sleep (N→N) during the laser and preceding 120 s baseline interval. Bootstrap; R→R, P = 0.0001; W→W, P = 0.8396; N→N, P = 0.0001; n = 10 mice. Shadings, 95% CIs.  (g) Differences of laser-induced changes in the cumulative transition probabilities between ChR2 and eYFP mice (**Methods**). Bootstrap; N→R, P = 0.0001; R→W, P = 0.0001; N→W, P = 0.0100; W→N, P = 0.8448; R→R, P = 0.0001; W→W, P = 0.8364; N→N, P = 0.0001. n = 10 mice. Blue lines, 95% CIs; white dots, distribution means.  (h) Duration of REM sleep episodes with (ON) or without (OFF) laser activation of ChR2-expressing mPFC→LH neurons and REM sleep duration in baseline recordings without laser stimulation (Bsl) in the same animals. One-way rm ANOVA (P = 0.0000); t-tests with Holm-Bonferroni correction; Bsl vs OFF: P = 0.0024; Bsl vs ON: P = 0.001; OFF vs ON: P = 0.0005. n = 10 mice. Box plots; lines, individual mice.  (i) Laser-induced changes in the δ, θ, and σ power (Δ power) between REM sleep with and without laser stimulation in eYFP and ChR2 mice. Mixed ANOVA with frequency band as within factor and virus (eYFP or ChR2) as between factor (interaction, P = 0.0001); t-tests with Holm-Bonferroni correction; eYFP vs ChR2: δ, P = 0.0021; θ, P = 0.0524; σ, P = 0.1380. ChR2, n =10; eYFP, n = 9 mice. Bars, averages across mice; dots, individual mice; error bars, 95% CIs.  See **Supplementary Table 1** for detailed statistical information. *P<0.05, **P<0.01, ***P<0.001. |
| Extended Data Fig. 9 | Effects of opto- and chemogenetic inhibition of mPFC→LH neurons on EEG and brain state. | Extended_Data_Fig_09.tif | (a) Left, heatmaps depicting expression of iC++-eYFP in the mPFC of mice injected with AAVrg-Cre-mCherry into the LH and AAV-DIO-iC++-eYFP into the mPFC and location of bilateral optic fiber tracts (n = 10 mice). Right, expression of mCherry in the hypothalamus.  (b) Top, laser-trial averaged normalized EEG spectrogram in iC++ mice. Bottom, time course of δ, θ, and γ power before, during, and after laser stimulation. Two-way rm ANOVA comparing the mean power in each frequency band between the laser and preceding 120 s baseline interval (interaction, P = 0.0004); t-tests with Holm-Bonferroni correction; baseline vs laser: δ, P = 0.0117; θ, P = 0.0023; γ, P = 0.0023. n = 10 mice. Lines, averages across mice, shadings, 95% CIs.  (c) Laser stimulation trials from all n = 8 control mice expressing eYFP in mPFC→LH neurons, sorted depending on the brain state at laser onset (t = 0 s, arrows).  (d) Effect of open-loop stimulation on brain states before, during, and after laser stimulation in eYFP control mice. Two-way rm ANOVA comparing the mean percentage of each brain state between the laser and preceding 120 s baseline interval (interaction, P = 0.2183). n = 8 mice. Lines, averages across mice; shadings, 95% CIs.  (e) Changes in the percentage of each brain state (difference between the 120 s baseline and laser interval) induced by laser stimulation in mice expressing iC++ and eYFP in mPFC→LH neurons. Mixed ANOVA with brain state as within and virus as between factor (interaction, P = 0.0077); t-tests with Holm-Bonferroni correction; eYFP vs iC++: REM, P = 0.0012; wake, P = 0.0456; NREM, P = 0.3301. iC++, n = 10; eYFP, n = 8 mice. Bars, averages across mice; dots, individual mice; error bars, 95% CIs.  (f) Cumulative transition probabilities in iC++ mice to remain in REM sleep (R→R), wake (W→W), or NREM sleep (N→N) during the laser and preceding 120 s baseline interval. Bootstrap; R→R, P = 0.0622; W→W, P = 0.3630; N→N, P = 0.4758; n = 10 mice. Shadings, 95% CIs.  (g) Differences of laser-induced changes in the cumulative transition probabilities between iC++ and eYFP mice (**Methods**). Bootstrap; N→R, P = 0.0032; R→W, P = 0.6490; N→W, P = 0.0388; W→N, P = 0.7432; R→R, P = 0.6490; W→W, P = 0.7432; N→N, P = 0.4762. iC++, n = 10; eYFP, n = 8 mice. Blue lines, 95% CIs; white dots, distribution means.  (h) Duration of REM sleep episodes with (ON) or without (OFF) inhibition of iC++-expressing mPFC→LH neurons and REM sleep duration in baseline recordings without laser stimulation (Bsl) in the same animals. One-way rm ANOVA (P = 0.0165); t-tests with Holm-Bonferroni correction; Bsl vs OFF: P = 0.3334; Bsl vs ON: P = 0.0107; OFF vs ON: P = 0.0620. n = 5 mice. Box plots; lines, individual mice.  (i) Laser-induced changes in the δ, θ, and σ power (Δ power) between REM sleep with and without laser stimulation in eYFP and iC++ mice. Mixed ANOVA with frequency band as within factor and virus (eYFP or iC++) as between factor (interaction, P = 0.0503). iC++, n = 10; eYFP, n = 8 mice. Bars, averages across mice; dots, individual mice; error bars, 95% CIs.  (j) Chemogenetic inhibition of mPFC→LH neurons. Left, schematic depicting viral strategy to express AAV-DIO-hM4D(Gi) or AAV-DIO-mCherry in mPFC→LH neurons. Right, fluorescence image showing expression of mCherry in the mPFC. Scale bar, 500 µm  (k) Left, heatmaps depicting expression of mCherry in the mPFC of mice injected with AAVrg-Cre-mCherry into the LH and AAV-DIO-hM4D(Gi)-mCherry into the mPFC (n = 9 mice). Right, expression of mCherry in the hypothalamus.  (l) Percentage of time spent in REM, NREM sleep, and wake and the ratio of REM to total sleep (REM + NREM) during 4 h recordings in hM4D(Gi) and mCherry mice following CNO (5 mg/kg) injection. T-tests; REM, P = 0.0029; wake, P = 0.1213; NREM, P = 0.0254; ratio, P = 0.0007. hM4D(Gi), n = 9; mCherry, n = 7 mice. Box plots; dots, individual mice.  (m) Effects of chemogenetic inhibition on the duration and frequency of REM sleep. T-tests; duration, P = 0.0285; frequency, P = 0.3380. hM4D(Gi), n = 9; mCherry, n = 7 mice. Box plots; dots, individual mice.  (n) Frequency of phasic θ events during REM sleep. T-test; P = 0.0052. hM4D(Gi), n = 9; mCherry, n = 7 mice. Box plots; dots, individual mice.  Brain atlas images in (a,j,k) adapted with permission from ref. 61. See **Supplementary Table 1** for detailed statistical information. *P<0.05, **P<0.01, ***P<0.001. |
| Extended Data Fig. 10 | Calcium imaging of mPFC→LH neurons. | Extended_Data_Fig_10.tif | (a) Position of GRIN lenses within the mPFC used for imaging of mPFC→LH neurons. Each diagram depicts the section where the lesion caused by the GRIN lens (colored bar) was largest (n = 8 mice). Brain atlas images adapted with permission from ref. 61.  (b) Normalized cross-correlation between EEG θ (6.0 - 9.5 Hz) or σ power (10 - 15 Hz) and ΔF/F activity of different mPFC→LH neuron subclasses during NREM sleep (**Methods**). One-sample t-test; θ: R>W>N, P = 0.0059; R>N>W, P = 0.0000; Wake-max, P = 0.0000; σ: R>W>N, P = 0.0002; R>N>W, P = 0.0000; Wake-max, P = 0.0000; R>W>N, n = 36; R>N>W, n = 43; Wake-max, n = 34. Lines, mean for the different cell subclasses. Shadings, ± s.e.m.  (c) Correlation between REM sleep duration and calcium activity of R>W>N and R>N>W neurons. Each dot represents the mean activity of one cell during a single REM sleep episode (R>W>N, 36 cells, n = 212 episodes; R>N>W, 43 cells, n = 240 episodes). Line, linear fit using robust regression. Robust regression; R>W>N, P = 0.0002, r = 0.1860; R>N>W, P = 0.2837, r = 0.0947. Shadings, 95% CIs.  (d) Activity of Wake-max cells during phasic θ events (onset at t = 0 s). Paired t-test; P = 0.5761; n = 34 cells. Line, average across mice; shadings, ± s.e.m.  See **Supplementary Table 1** for detailed statistical information. |

***Do not insert additional rows - total number of Extended Data items must not exceed 10.***

1. **Supplementary Information:**
2. **PDF Files**

**Complete the Inventory below for all additional textual information and any additional Supplementary Figures, which should be supplied in one combined PDF file.**

- **Row 1:** A combined PDF containing any Supplementary Text, Discussion, Notes, Additional Supplementary Figures, Supplementary Protocols, simple tables, and all associated legends. **Only one such file is permitted**.
- **Row 2:** Nature Research’s Reporting Summary; if previously requested by the editor, please provide an updated Summary, fully completed, without any mark-ups or comments. **(Reporting Summaries are not required for all manuscripts.)**

**Note:** Please do not include a title page within your Supplementary Information file - a cover sheet that includes the title of your paper and a hyperlink to it will be automatically added while preparing your manuscript for publication

| Item | Present? | Filename  Whole original file name including extension. i.e.: Smith_SI.pdf. The extension must be .pdf | A brief, numerical description of file contents.  i.e.: *Supplementary Figures 1-4, Supplementary Discussion, and Supplementary Tables 1-4.* |
| --- | --- | --- | --- |
| Supplementary Information | Yes | Supple_inf.pdf | Supplementary Figures 1-7, Supplementary Tables 3-4, legends for Supplementary Tables 1-2 and for Supplementary Videos 1-3. |
| Reporting Summary | Yes | Reporting_summary.pdf |
| Peer Review Information | Yes | *OFFICE USE ONLY* |

1. **Additional Supplementary Files**

**Complete the Inventory below for all additional Supplementary Files that cannot be submitted as part of the Combined PDF.**

- Do not list Supplementary Figures in this table (see section 2A)
- Where possible, include the title and description within the file itself
- Spreadsheet-based tables & data should be combined into a workbook with multiple tabs, not submitted as individual files.
- Compressed files are acceptable where necessary. ZIP files are preferred.
- Please note that the *ONLY* allowable types of additional Supplementary Files are:

| - Supplementary Tables | - Supplementary Audio | - Supplementary Videos | - Supplementary Software |
| --- | --- | --- | --- |
| - Supplementary Code | - Supplementary Data, for example: - Source Data for Supplementary Figures - Raw NMR Data, Cryo-EM Data - Computational Data, Crystallographic Data, etc. | | |

| Type | Number  Each type of file (Table, Video, etc.) should be numbered from 1 onwards. Multiple files of the same type should be listed in sequence, i.e.: Supplementary Video 1, Supplementary Video 2, etc. | Filename  Whole original file name including extension. i.e.: *Smith_ Supplementary_Video_1.mov* | Legend or Descriptive Caption  Describe the contents of the file |
| --- | --- | --- | --- |
| Supplementary Table | Supplementary Table 1 | Supplementary Table 1.xlsx | Statistical results for Figures and Extended Data Figures. |
| Supplementary Table | Supplementary Table 2 | Supplementary Table 2.xlsx | Statistical information on imaged mPFC→LH cells (related to Fig. 5). |
| Supplementary Video | Supplementary Video 1 | Supplementary Video 1.mov | Induction of REM sleep by optogenetic activation of mPFC Pyr neurons. |
| Supplementary Video | Supplementary Video 2 | Supplementary Video 2.mov | Rapid eye movements during REM sleep. |
| Supplementary Video | Supplementary Video 3 | Supplementary Video 3.mov | In vivo calcium imaging of mPFC→LH neurons. |
| Choose an item. |  |  |  |

***Add rows as needed to accommodate the number of files.***

**3. Source Data**

**Complete the Inventory below for all Source Data files.**

- Acceptable types of Source Data for Main Figures and Extended Data Figures or Tables are:
  - Statistical Source Data
    - Plain Text (ASCII, csv, TXT) or Excel formats only
    - Either one file for each relevant Figure, or a single file containing all source data, with clearly named tabs for each Figure/Extended Data Figure item
  - Full-length, unprocessed gels or blots
    - JPG, TIF, or PDF formats only
    - One file for each relevant Figure containing all supporting blots and/or gels, or a single file with clearly labeled gels or blots for each Figure/ED Figure item
- Source Data for Supplementary Figures is not allowed. Instead:
  - Include Unprocessed Gels or Blots for Supplementary Figures as additional Supplementary Figures to the main Supplementary Information PDF file.
  - Include Statistical Source Data for Supplementary Figures as ‘Supplementary Data’ files and list them in section 2B.
  - Please see [this example of Source Data](https://www.nature.com/articles/s41591-019-0505-4) in a publication.

| Parent Figure or Table | Filename  Whole original file name including extension. i.e.: *Smith_SourceData_Fig1.xls,* or *Smith_ Unmodified_Gels_Fig1.pdf* | Data description  i.e.: Unprocessed western Blots and/or gels, Statistical Source Data, etc. |
| --- | --- | --- |
| Source Data Fig. 1 | Source_Data_Figure_01.xlsx | Statistical source data for Figure 1. |
| Source Data Fig. 2 | Source_Data_Figure_02.xlsx | Statistical source data for Figure 2. |
| Source Data Fig. 3 | Source_Data_Figure_03.xlsx | Statistical source data for Figure 3. |
| Source Data Fig. 4 | Source_Data_Figure_04.xlsx | Statistical source data for Figure 4. |
| Source Data Fig. 5 | Source_Data_Figure_05.xlsx | Statistical source data for Figure 5. |
| Source Data Fig. 6 | Source_Data_Figure_06.xlsx | Statistical source data for Figure 6. |
| Source Data Fig. 7 |  |  |
| Source Data Fig. 8 |  |  |
| Source Data Extended Data Fig./Table 1 | Source_Data_Ext_Data_Fig_01.xlsx | Statistical source data for Extended Data Figure 1. |
| Source Data Extended Data Fig./Table 2 | Source_Data_Ext_Data_Fig_02.xlsx | Statistical source data for Extended Data Figure 2. |
| Source Data Extended Data Fig./Table 3 | Source_Data_Ext_Data_Fig_03.xlsx | Statistical source data for Extended Data Figure 3. |
| Source Data Extended Data Fig./Table 4 | Source_Data_Ext_Data_Fig_04.xlsx | Statistical source data for Extended Data Figure 4. |
| Source Data Extended Data Fig./Table 5 | Source_Data_Ext_Data_Fig_05.xlsx | Statistical source data for Extended Data Figure 5. |
| Source Data Extended Data Fig./Table 6 | Source_Data_Ext_Data_Fig_06.xlsx | Statistical source data for Extended Data Figure 6. |
| Source Data Extended Data Fig./Table 7 | Source_Data_Ext_Data_Fig_07.xlsx | Statistical source data for Extended Data Figure 7. |
| Source Data Extended Data Fig./Table 8 | Source_Data_Ext_Data_Fig_08.xlsx | Statistical source data for Extended Data Figure 8. |
| Source Data Extended Data Fig./Table 9 | Source_Data_Ext_Data_Fig_09.xlsx | Statistical source data for Extended Data Figure 9. |
| Source Data Extended Data Fig./Table 10 | Source_Data_Ext_Data_Fig_10.xlsx | Statistical source data for Extended Data Figure 10. |
